# Supplementary material
Source: PubMed Central journal article supplement (PMC8640588)
Supplement: mmc1.pdf [file mmc1.pdf]

## **Supplemental Material**

### **MATERIALS AND METHODS**

#### **Sample acquisition and patients**

Samples and clinical data from COVID-19 patients were collected from consented hospitalized patients at the Washington University Medical Center under an institutional review board approved protocol to study immunological, genetic and clinical predictors of SARS CoV-2 infection (IRB ID # 202003085) between March and May 2020. SARS-CoV-2 was confirmed using an FDA approved PCR test and detailed clinical metadata has been described<sup>S1</sup>. Clinical data were extracted from electronic health records by the Institute of Informatics and provided in a deidentified manner. The clinical diagnosis of AKI incorporates modified guidelines from the Kidney Disease Improving Global Outcomes (KDIGO) for selecting samples from patients with AKI (rise in serum creatinine (SCr) by 0.3 mg/dL over 48 hours, OR 50% rise in SCr from baseline during current hospitalization OR decrease in urine output by 0.5 ml/kg/hour for 6 hours)<sup>S2, S3</sup>. Urine from healthy volunteers was obtained from the Kidney Translational Research Center (KTRC) (Table S1).

#### **Urine processing and storage**

Urine samples were collected within first 3 days during hospital visit in a sterile cup as convenient and transported by the hospital staff twice a day to the laboratory, stored at 4 °C until ready for processing on the same day. All samples were processed and stored in less than 24 hours. Urine was filtered through a 40µm mesh followed by a 2,000xg centrifugation for 12 minutes. The cell pellet was preserved in RNAlater and the supernatant immediately aliquoted into cryovials and stored at -80 °C until ready for experimental analysis. Where possible, samples were serially collected with first day of collection (typically first day of hospitalization) designated as day (D) 0. To initially determine the quality of specimens we checked the presence of various analytes including several kidney injury and proinflammatory markers using the Meso Scale Discovery

(MDS) platform services offered by the George M. O'Brien Center at the Johns Hopkins University (Table S1). The adequacy of the COVID-19 urine samples was confirmed by measuring several markers of AKI and inflammation prior to proceeding with urine proteome studies (Table S1 and not shown).

### **Proteomics sample preparation**

Proteins in each 150  $\mu$ L aliquot of urine were denatured by mixing with 117 mg urea (final 8M). Samples were incubated at 60°C for 30 min with constant shaking at 800 rpm after adding dithiothreitol (DTT, 5 mM). Samples were then cooled to room temperature, alkylated by the addition of 40 mM iodoacetamide (IAA), and were incubated at room temperature for 30 min in the dark. Samples were then diluted 8-fold in volume with 100 mM  $\text{NH}_4\text{HCO}_3$  buffer (pH 8.0) containing 1 mM  $\text{CaCl}_2$ . Sequencing-grade modified porcine trypsin (Promega) was added at a 1:20 (w/w) trypsin-to-protein ratio to digest proteins at 37°C for 5 h with shaking at 500 rpm. The digestion process was stopped by adding to a concentration of 1% trifluoroacetic acid (TFA) and desalted with Discovery C18 50 mg/1 mL solid phase extraction (SPE) columns (Supelco) using a Gilson GX-274 ASPEC™ system (Gilson Inc.). For desalting, each SPE tube was conditioned by 3 mL of methanol, followed by 3 mL of 0.1% TFA aqueous solution. The acidified samples were then loaded to each column followed by washing with 4 mL of 95:5 (v/v)  $\text{H}_2\text{O}$ :acetonitrile with 0.1% TFA. The samples were eluted with 1 mL 80:20 (v/v) acetonitrile: $\text{H}_2\text{O}$  with 0.1% TFA. The peptide-containing eluents were concentrated down to approximately 100  $\mu$ L using a SpeedVac vacuum concentrator. The final peptide concentration was quantified by a Pierce™ bicinchoninic acid (BCA) Assay Kit (Thermo Fisher Scientific). The samples were diluted to 0.10  $\mu$ g/ $\mu$ L with nanopure water for proteomics LC-MS/MS analysis.

### **LC-MS/MS-based proteomics analysis**

The proteomics analysis was carried out with liquid chromatography-tandem mass spectrometry (LC-MS/MS). The liquid chromatograph (LC) consisted of a nanoAcquity M-Class UPLC system (Waters) equipped with an analytical column packed in-house with 3  $\mu\text{m}$  Jupiter C18 media (Phenomenex) into 75  $\mu\text{m}$  (i.d.)  $\times$  70 cm (long). The trapping column 150  $\mu\text{m}$  (i.d.)  $\times$  4 cm (long) was packed by 5  $\mu\text{m}$  Jupiter C18 particles (Phenomenex). 5  $\mu\text{L}$ s of each digested sample were loaded onto the LC system, and peptides were separated at 300 nL/min at room temperature. Mobile phases were comprised of mobile phase A (0.1% formic acid in water) and mobile phase B (0.1% formic acid in acetonitrile) with the following applied separation gradient: 1-8% B for 2 min, 8-12% B for 18 min, 12-30% B for 55 min, 30-45% B for 22 min, 45-95% B for 3 min, maintained at 95% for 10 min, and equilibrated at 1% B for 20 min.

The eluted peptides from the LC system were analyzed using a Q-Exactive HF-X mass spectrometer (Thermo Fisher Scientific) outfitted with a custom nano-electrospray ionization (ESI) interface consisting of an electrospray emitter prepared by 150  $\mu\text{m}$  (o.d.)  $\times$  20  $\mu\text{m}$  (i.d.) chemically etched fused silica<sup>S4</sup>. Spray voltage and ion transfer tube temperature were controlled at 2.2 kV and 300 °C, respectively. Full MS scans were acquired from 300 – 1800 m/z at a resolution of 60,000, AGC target of 3e6. Top 12 data-dependent tandem MS scans were performed at a resolution of 15,000, AGC target of 1e5, isolation window of 1.0 m/z, normalized collision energy of 30, and dynamic exclusion of 30 sec.

### **Proteomics data processing**

The Raw MS datasets were searched with MaxQuant (v1.6.0.16)<sup>S5</sup> against a database containing the Uniprot *homo sapiens* proteome (released on Nov. 5, 2019) and the Uniprot SARS-COV-2 proteome (released on Aug. 17, 2020). In the MaxQuant search, methionine oxidation and N-term acetylation were set as variable modifications, and carbamidomethylation was set as a fixed modification. The “match between runs” function with a 1.5-min time window was applied to

identify peptides. False discovery rates (FDRs) at the peptide level and protein level were set to less than 0.01. Trypsin was selected as the digestion enzyme with up to two allowable missed cleavages. Default settings were used for the rest of the search parameters. The MaxQuant output containing protein groups and intensity values was processed with RStudio (v3.5.1) scripts. In brief, the proteome data were first filtered to retain proteins with more than 80% of detectability in the urine samples from the patients with acute kidney injury (AKI+) or in the urine samples from the patients without acute kidney injury (AKI-). The missing intensities of the remaining proteins were imputed following a method described previously<sup>S6</sup>. The intensities were log<sub>2</sub> transformed and median centered prior to the statistical analysis. The Linear Models for Microarray Data (limma test) was applied to assess the intensities of proteins that were significantly changed in AKI+ compared to AKI- using the R package 'limma'. The FDR was controlled by 'Benjamini and Hochberg' adjustment with the value 0.05 chosen as the cutoff to define statistical significance. The limma test was used because it applies linear models to integrate the whole data rather than comparing between categorized groups, making the statistical conclusions more reliable when the number of samples is small<sup>S7</sup>. The log<sub>2</sub> fold change of protein intensity due to AKI status was calculated by normalizing the mean protein intensity measured in the AKI+ group to the mean protein intensity measured in the AKI- group. The proteins with significantly different expression levels (adjust  $p < 0.05$ , log<sub>2</sub> fold change  $<0$  or  $>0$ ) were selected for enrichment analyses for Gene Ontology (GO) terms, KEGG pathways, and Reactome pathways using the online tool metascape<sup>S8</sup>.

To further validate SARS-CoV-2 peptide detection in the urine proteome data, each of the two datasets which contained SARS-CoV-2 peptides using MaxQuant were analyzed using MS-GF+ (v2020.08.05)<sup>S9</sup> against the same databases used for the MaxQuant search. Methionine oxidation and N-term acetylation were set as variable modifications, and carbamidomethylation was set as a fixed modification. Settings allowed partial trypsin digestion (up to two missed cleavages) and

the parent-ion-mass tolerance was set at 20 ppm or less. The outcomes of MS-GF+ results were filtered using parent-ion-mass tolerance < 10 ppm, MSGFDB\_SpecEValue <  $1 \times 10^{-10}$ , and Q values of peptides < 0.01. The resulting FDR values at the peptide and protein level were calculated as 0.0005 and 0.0075, respectively.

### **Correlation analysis of COV-AKI patients compared to non-AKI patients.**

A total of 980 urinary proteins were quantifiable based on their MS intensities reported by MaxQuant software (Table S2). The patient-to-patient correlation was assessed by Pearson correlation of log<sub>2</sub> transformed protein abundances across the entire patient cohort, ranging from 0.28 to 0.90 (Figure S1). Relatively higher correlation (>0.7) was observed between the majority of AKI- patients; however, lower correlation was observed across AKI+ and AKI- groups (<0.5). This suggests large discrepancies of protein abundances in urine due to AKI status.

### **Data availability**

All the datasets, MaxQuant search parameters, MS-GF+ search parameters, and the corresponding results files are available at the ProteomeXchange Consortium website using the PRIDE <sup>29, 30</sup> partner repository with the dataset identifier PXD025178 and 10.6019/PXD025178.

## Supplemental References:

- S1. Mudd PA, Crawford JC, Turner JS, *et al.* Distinct inflammatory profiles distinguish COVID-19 from influenza with limited contributions from cytokine storm. *Sci Adv* 2020; **6**.
- S2. Kellum JA, Lameire N, Aspelin P, *et al.* Kidney disease: Improving global outcomes (KDIGO) acute kidney injury work group. KDIGO clinical practice guideline for acute kidney injury. *Kidney International Supplements* 2012; **2**: 1-138.
- S3. Siew ED, Ikizler TA, Matheny ME, *et al.* Estimating baseline kidney function in hospitalized patients with impaired kidney function. *Clin J Am Soc Nephrol* 2012; **7**: 712-719.
- S4. Kelly RT, Page JS, Luo Q, *et al.* Chemically etched open tubular and monolithic emitters for nanoelectrospray ionization mass spectrometry. *Anal Chem* 2006; **78**: 7796-7801.
- S5. Tyanova S, Temu T, Cox J. The MaxQuant computational platform for mass spectrometry-based shotgun proteomics. *Nat Protoc* 2016; **11**: 2301-2319.
- S6. Polpitiya AD, Qian WJ, Jaitly N, *et al.* DANTE: a statistical tool for quantitative analysis of -omics data. *Bioinformatics* 2008; **24**: 1556-1558.
- S7. Tyanova S, Temu T, Sinitcyn P, *et al.* The Perseus computational platform for comprehensive analysis of (prote)omics data. *Nat Methods* 2016; **13**: 731-740.
- S8. Zhou Y, Zhou B, Pache L, *et al.* Metascape provides a biologist-oriented resource for the analysis of systems-level datasets. *Nat Commun* 2019; **10**: 1523.
- S9. Kim S, Pevzner PA. MS-GF+ makes progress towards a universal database search tool for proteomics. *Nat Commun* 2014; **5**: 5277.

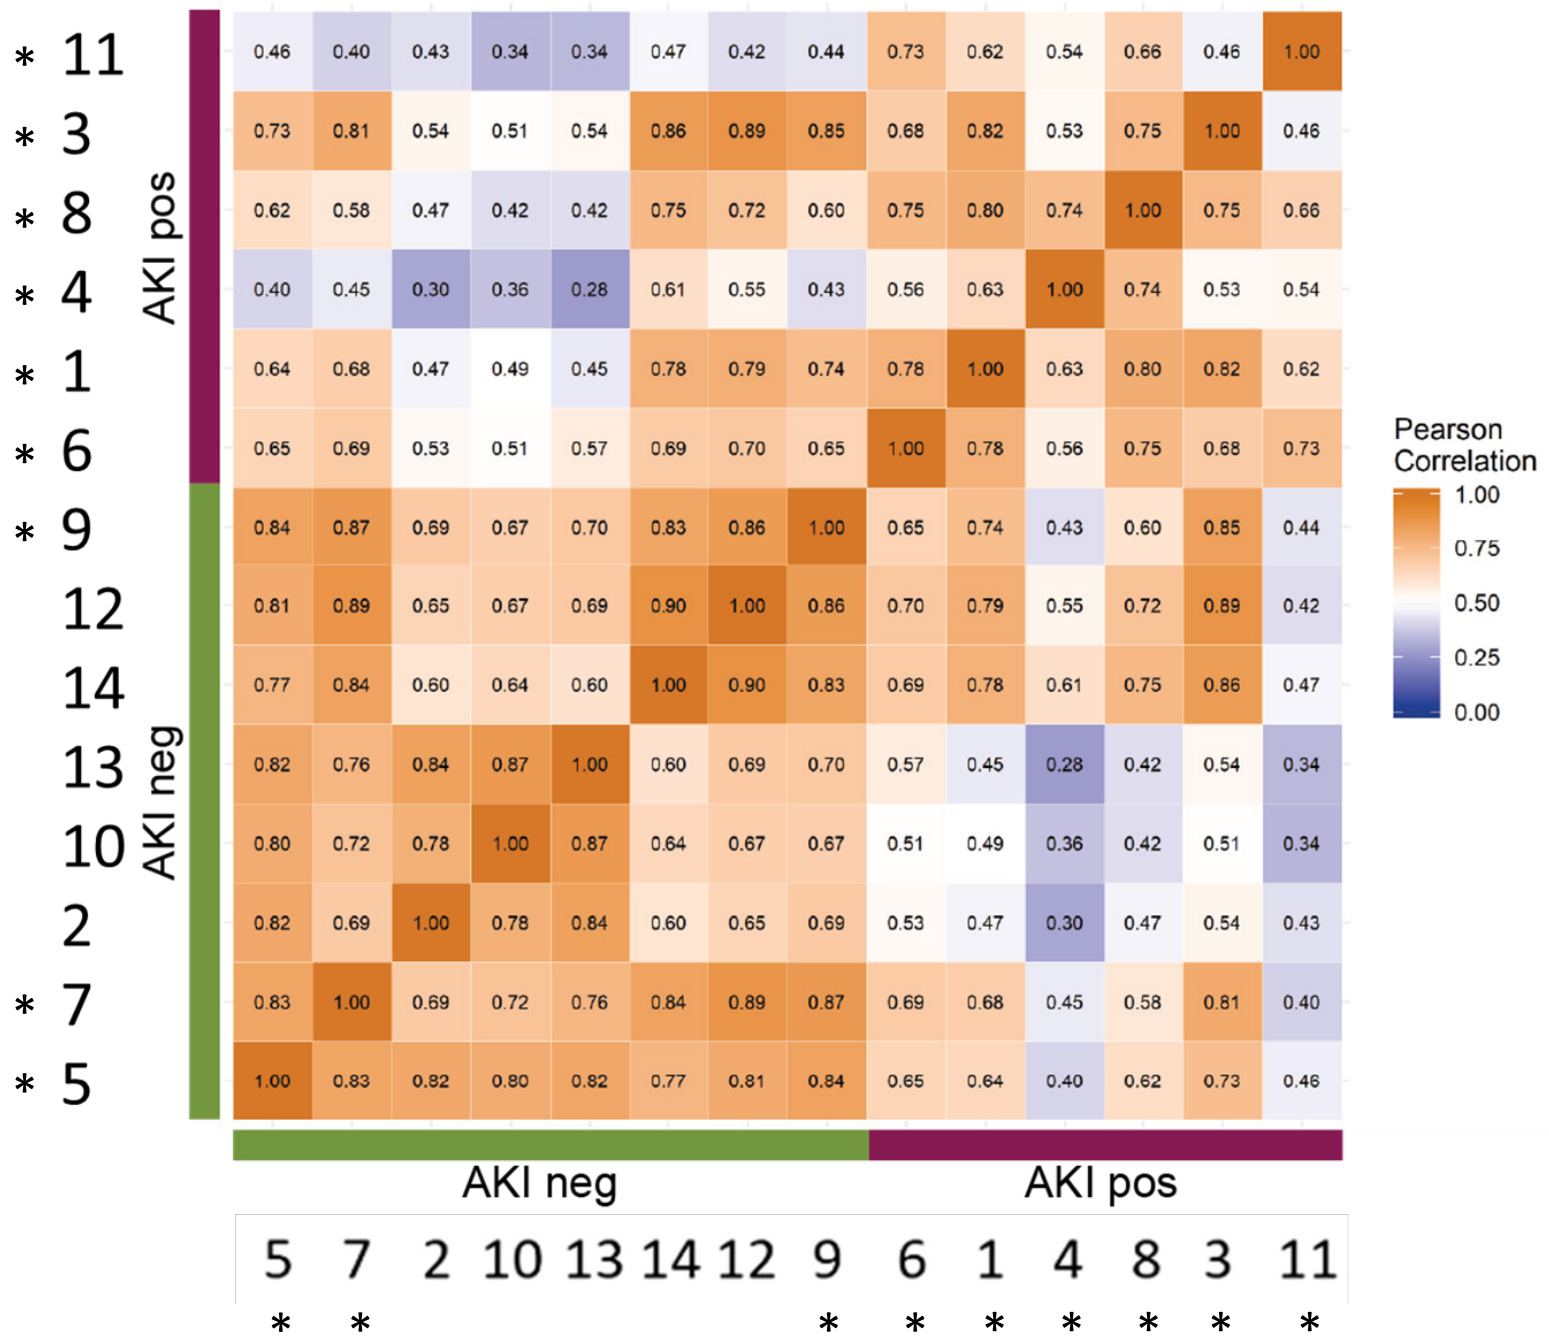

**A**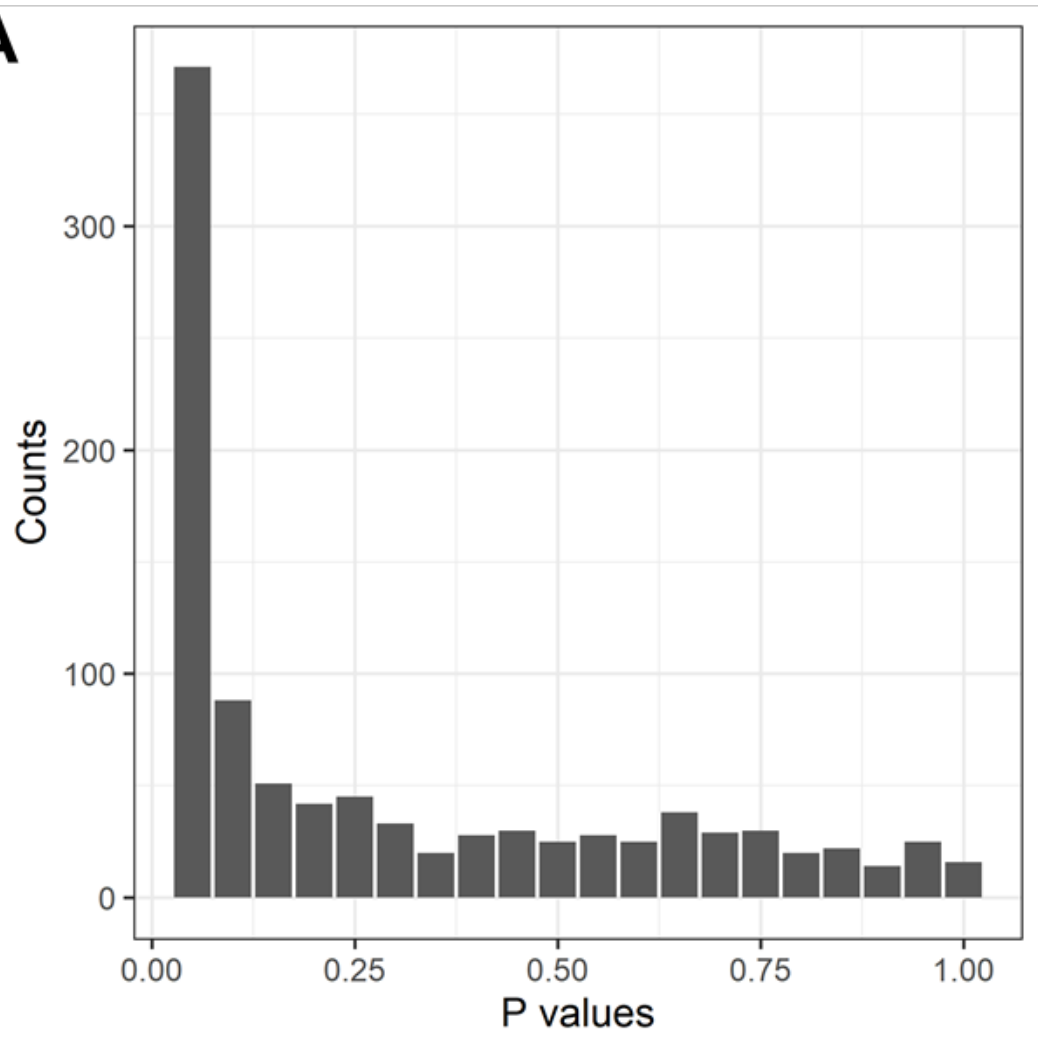**B**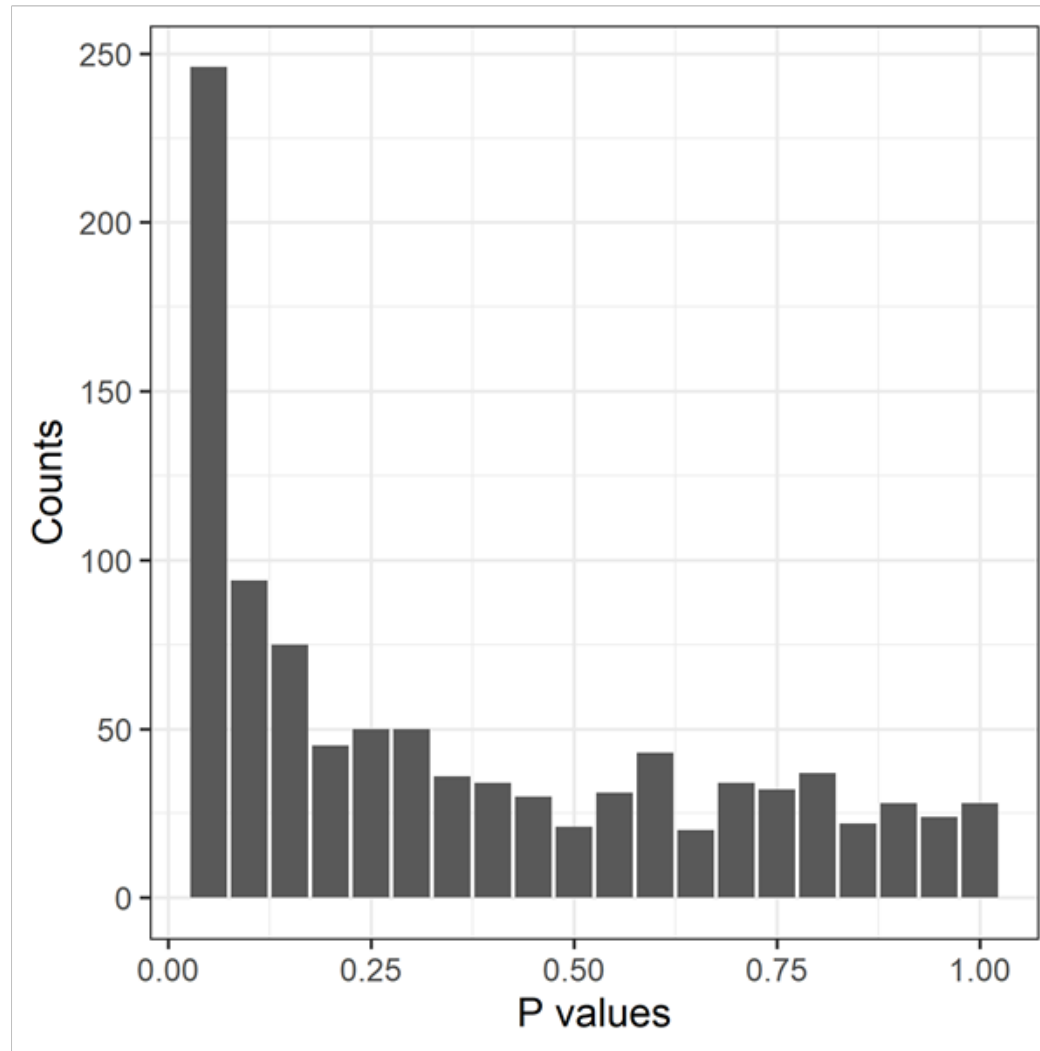



## Supplemental Figure Legends

Figure S1. Pearson correlation of urinary proteomics across the studied samples.

Patients are numbered according to the patient key. Asterisks (\*) denote COVID-19 positive cases.

Figure S2. Distribution of p values before adjustment. (A) Statistical results of limma test that compared the intensities of urinary proteins based on the status of acute kidney injury (AKI). (B) Statistical results of limma test that compared the intensities of urinary proteins altered during COVID-19 infection in the AKI negative group.





|                         |              |         |                                                 |        |        |        |        |        |        |        |        |        |        |        |        |         |          |          |          |          |          |          |          |          |          |          |          |        |
|-------------------------|--------------|---------|-------------------------------------------------|--------|--------|--------|--------|--------|--------|--------|--------|--------|--------|--------|--------|---------|----------|----------|----------|----------|----------|----------|----------|----------|----------|----------|----------|--------|
| sp Q13477 MAI Q13477    | MADA2_HUMAN  | MADCAM2 | mucosal vascular addressin-1                    | -1.133 | -1.830 | -2.124 | 1.059  | -0.075 | -0.753 | -1.860 | -1.474 | -3.027 | -4.170 | -0.729 | -3.478 | -2.797  | -6.354   | 0.001723 | 0.013160 | -2.697   | 0.019398 | 0.115617 | -2.108   | 0.206813 | 0.428491 | -0.942   |          |        |
| sp Q18700 HAI Q18700    | HAVCR2_HUMAN | HAVCR2  | hepatitis A virus cell surface receptor         | 3.759  | 2.908  | 1.545  | 2.546  | 1.625  | 2.775  | 2.108  | 1.910  | -0.528 | 1.837  | 2.111  | -4.626 | 0.201   | -5.308   | 0.001774 | 0.034040 | -3.589   | 0.003517 | 0.051059 | -3.865   | 0.764661 | 0.876790 | 0.121    |          |        |
| sp P13362 FOF1 P13362   | FOF1_HUMAN   | FOF1    | fibroblast growth factor 3 complementing factor | 2.059  | -2.687 | -2.238 | -1.633 | -2.226 | -2.079 | -2.238 | -1.637 | -2.519 | -2.860 | -3.183 | -7.650 | -7.430  | -3.302   | 0.001774 | 0.013160 | -2.772   | 0.004740 | 0.290079 | -3.947   | 0.692439 | 0.844017 | 0.280    |          |        |
| sp P02766 TTH P02766    | TTH_HUMAN    | TTR     | transferrin (beta chain)                        | 2.869  | 0.520  | 1.785  | 1.746  | -1.492 | 7.011  | 5.628  | 3.184  | 4.775  | 5.717  | 5.529  | 4.640  | 9.047   | 3.307    | 0.001954 | 0.014374 | 2.796    | 0.023047 | 0.744293 | 1.878    | 0.01716  | 0.067705 | 0.189    |          |        |
| sp P15941 MUC1 P15941   | MUC1_HUMAN   | MUC1    | mucin 1, cell surface associated                | 2.552  | 1.332  | 2.719  | 2.744  | 2.401  | -0.481 | -0.961 | 1.495  | 1.257  | -0.525 | -1.476 | -7.000 | -10.186 | -2.512   | 0.001965 | 0.014374 | -4.510   | 0.019485 | 0.349859 | -3.075   | 0.000510 | 0.018079 | -2.333   |          |        |
| sp P08164 LRP2 P08164   | LRP2_HUMAN   | LRP2    | LDL receptor family class B member 2            | 3.794  | 4.940  | 2.455  | 4.836  | 4.379  | 4.896  | 5.534  | 3.942  | 4.665  | 2.121  | 3.511  | -1.706 | 8.326   | 0.937    | 0.001907 | 0.014374 | -2.634   | 0.012784 | 0.088225 | -3.630   | 0.041910 | 0.643994 | 0.716    |          |        |
| sp Q86938 XYLT1 Q86938  | XYLT1_HUMAN  | XYLT1   | lysyl oxidase-like protein                      | 0.638  | -0.187 | -1.111 | -0.385 | -0.961 | -1.269 | -1.113 | -0.558 | -2.176 | -1.940 | -1.281 | -3.994 | -3.850  | -2.985   | 0.001943 | 0.014374 | -2.119   | 0.021111 | 0.126703 | -1.966   | 0.017678 | 0.888731 | -0.246   |          |        |
| sp Q08959 CDH Q08959    | CDHR2_HUMAN  | CDHR2   | cadherin related family class D member 2        | 1.369  | 0.978  | -4.079 | 0.518  | -0.472 | 0.958  | 1.694  | 2.003  | -2.662 | -2.794 | -1.530 | 0.964  | -5.154  | -1.468   | -1.611   | 0.001912 | 0.014374 | -2.281   | 0.000580 | 0.025850 | -3.474   | 0.122780 | 0.315572 | 1.909    |        |
| sp P08174 DAF P08174    | DAF_HUMAN    | CD55    | CD55 molecule (Crome glycoprotein)              | 4.969  | 4.578  | 3.839  | 3.979  | 4.120  | 4.920  | 4.059  | 4.565  | 2.974  | 3.318  | 3.415  | 0.393  | -0.245  | 1.650    | 0.020214 | 0.014620 | -2.430   | 0.000811 | 0.028388 | -2.937   | 0.037106 | 0.597458 | 0.811    |          |        |
| sp Q08899 CUT Q08899    | CUTA_HUMAN   | CUTA    | cysA divalent cation transporter                | -0.874 | -1.087 | -3.368 | 1.100  | 0.734  | -1.187 | -1.686 | -0.663 | -2.454 | -5.705 | -1.588 | -6.744 | -7.584  | -5.300   | 0.002206 | 0.015702 | -4.234   | 0.000387 | 0.023036 | -8.797   | 0.250035 | 0.479519 | -0.700   |          |        |
| sp Q08899 LAI Q08899    | LAI1_HUMAN   | LAI1    | lysyl oxidase-like protein                      | -3.661 | -4.597 | -4.964 | -7.454 | -3.020 | -6.626 | -2.600 | -5.279 | -2.384 | -1.266 | -1.466 | -0.443 | -2.293  | -1.510   | 0.002212 | 0.015702 | 2.190    | 0.001862 | 0.038014 | -2.796   | 0.046853 | 0.731322 | -0.706   |          |        |
| sp Q08899 LAI Q08899    | LAI1_HUMAN   | LAI1    | lysyl oxidase-like protein                      | 4.544  | 4.168  | 4.400  | 4.523  | 3.675  | 1.868  | 2.657  | 3.184  | 3.916  | 2.075  | 1.915  | -2.117 | 0.202   | 0.560    | 0.002215 | 0.015702 | 3.053    | 0.012798 | 0.038014 | -2.990   | 0.013088 | 0.089219 | -1.700   |          |        |
| sp Q06133 CLA Q06133    | CD30L3_HUMAN | CD30L3  | CD30 molecule (lymphocyte surface antigen)      | 3.905  | 1.463  | 1.548  | 3.519  | 3.650  | 1.687  | -0.800 | 3.271  | -0.407 | 0.231  | 0.755  | -2.903 | -1.253  | -2.503   | 0.002227 | 0.015702 | -3.384   | 0.004848 | 0.283617 | -2.639   | 0.031889 | 0.575893 | -1.191   |          |        |
| sp P26842 CD2 P26842    | CD27_HUMAN   | CD27    | CD27 molecule (p134)                            | 4.125  | 3.112  | 3.044  | 2.236  | 2.887  | 5.927  | 3.881  | 4.410  | 2.254  | 1.733  | 2.804  | -1.550 | -0.153  | 0.588    | 0.002274 | 0.015835 | -2.777   | 0.003933 | 0.059466 | -3.122   | 0.278322 | 0.503238 | 0.807    |          |        |
| sp Q15485 FCN2 Q15485   | FCN2_HUMAN   | FCN2    | ficollin 2                                      | 1.158  | -0.972 | -0.096 | 1.444  | 0.172  | 0.036  | -4.250 | -2.594 | -4.040 | -6.899 | -6.105 | -2.211 | -3.446  | -3.760   | 0.002278 | 0.015835 | -3.133   | 0.286010 | 0.521818 | -1.498   | 0.022469 | 0.125829 | -2.616   |          |        |
| sp P21810 PGC1 P21810   | BGN_HUMAN    | BGN     | biginin                                         | -1.522 | -0.561 | -1.062 | 0.816  | -0.828 | -1.935 | -2.213 | -2.151 | -4.044 | -5.751 | -1.170 | -4.527 | -4.267  | 0.002311 | 0.015934 | -3.418   | 0.002311 | 0.015934 | -3.418   | 0.002311 | 0.015934 | -3.418   | 0.002311 | 0.015934 | -3.418 |
| sp Q07877 BTN2A1 Q07877 | BTN2A1_HUMAN | BTN2A1  | butyrophilin subfamily 1 member 1               | 0.927  | 0.486  | 0.312  | 2.710  | 2.802  | -0.533 | -0.024 | -1.088 | -1.509 | -1.779 | -1.646 | -2.786 | 0.328   | -3.950   | 0.002325 | 0.015934 | -3.198   | 0.026497 | 0.133162 | -2.267   | 0.075838 | 0.248564 | -1.811   |          |        |
| sp Q08174 PCD Q08174    | PCDH1_HUMAN  | PCDH1   | protocadherin 1                                 | -1.713 | -0.547 | -4.534 | -2.662 | 1.557  | -2.060 | -0.014 | -1.957 | -4.548 | -3.156 | -3.834 | -3.771 | -8.959  | 0.002444 | 0.016630 | -3.329   | 0.022415 | 0.126703 | -2.027   | 0.066538 | 0.828566 | -0.164   |          |          |        |
| sp P36896 ACV P36896    | ACV1B_HUMAN  | ACV1B   | activin A receptor type 1B                      | 1.298  | 1.399  | 0.535  | 1.319  | 0.578  | 0.285  | 0.589  | 1.133  | -1.295 | 0.312  | 0.399  | -8.639 | -1.337  | -1.524   | 0.002518 | 0.016867 | -2.906   | 0.018994 | 0.112136 | -2.683   | 0.531385 | 0.745004 | -0.356   |          |        |
| sp P08748 V3 P08748     | SPR3_HUMAN   | SPR3    | small proline-rich protein 3                    | 3.796  | 0.331  | 0.822  | 2.029  | 2.469  | 4.871  | -3.727 | 1.217  | -4.873 | -5.244 | -6.570 | -9.127 | 0.030   | 2.340    | 0.002530 | 0.016867 | -6.011   | 0.023064 | 0.454527 | -2.482   | 0.041095 | 0.660968 | -1.127   |          |        |
| sp P00749 URO P00749    | PLAU_HUMAN   | PLAU    | plasminogen activator-like 1                    | -0.072 | -0.703 | 0.909  | 0.773  | 3.448  | -0.926 | 0.075  | 1.881  | -4.797 | -1.550 | -2.511 | -0.160 | -1.275  | -2.362   | 0.002583 | 0.017102 | -2.689   | 0.020453 | 0.130590 | -2.219   | 0.571495 | 0.766122 | -0.751   |          |        |
| sp Q05998 IL8 Q05998    | IL18BP_HUMAN | IL18BP  | interleukin 18 binding protein                  | 3.400  | 1.004  | 2.091  | 2.956  | 3.307  | -0.466 | 0.277  | 4.185  | -1.098 | 0.506  | 0.227  | -1.750 | -1.729  | -3.459   | 0.002664 | 0.017407 | -3.800   | 0.016852 | 0.320769 | -2.709   | 0.025268 | 0.206231 | -0.751   |          |        |
| sp P01040 CYT P01040    | CSTA_HUMAN   | CSTA    | cystatin A (heart,prostate,pancreas)            | 2.791  | -1.448 | 3.919  | -0.288 | 1.519  | -0.399 | -8.125 | -0.645 | -3.099 | -3.800 | -1.981 | -6.166 | -0.438  | -2.283   | 0.002650 | 0.017407 | -2.336   | 0.013929 | 0.317924 | -2.136   | 0.098108 | 0.284541 | -3.033   |          |        |
| sp Q04157 ANG Q04157    | ANGPT7_HUMAN | ANGPT7  | angiotensinogen converting enzyme 7             | -8.429 | -9.252 | -7.818 | -9.362 | -5.173 | -6.075 | -9.513 | -2.679 | -5.117 | -2.284 | -3.589 | -4.666 | -3.382  | -2.919   | 0.002789 | 0.017939 | 3.203    | 0.230841 | 0.461681 | 1.210    | 0.020671 | 0.118493 | 4.817    |          |        |
| sp P05062 ALDO P05062   | ALDOB_HUMAN  | ALDOB   | aldolase, fructose-1,6-bisphosphate             | 1.015  | 3.889  | -0.289 | 3.836  | 3.415  | 2.515  | 1.478  | 2.004  | -0.761 | -2.317 | 0.258  | -5.783 | -1.169  | -2.729   | 0.002819 | 0.017939 | -3.900   | 0.003456 | 0.051059 | -3.672   | 0.709238 | 0.852979 | -0.364   |          |        |
| sp P06870 KLU P06870    | KLU1_HUMAN   | KLU1    | kalikrein 1 (kidney/plasma)                     | 3.002  | 1.271  | 5.891  | 6.106  | 5.764  | 2.029  | 0.865  | 1.239  | 2.022  | -2.996 | -7.122 | -3.400 | -0.965  | -0.523   | 0.002805 | 0.017939 | -5.439   | 0.016118 | 0.080300 | -3.546   | 0.032827 | 0.153781 | -3.029   |          |        |
| sp P07204 TRB P07204    | TRB_HUMAN    | TRB     | thrombomodulin                                  | -2.492 | -3.024 | -2.211 | -0.676 | -0.966 | -3.230 | -4.791 | -1.841 | -2.384 | -3.958 | -4.923 | -5.894 | -6.738  | -2.212   | 0.002779 | 0.017939 | -2.339   | 0.216662 | 0.452828 | -3.456   | 0.050505 | 0.203891 | -0.609   |          |        |
| sp P00742 FAL1 P00742   | FAL1_HUMAN   | FAL1    | coagulation factor X                            | -8.184 | -9.004 | -4.318 | -4.676 | -3.776 | -2.833 | -5.216 | -6.279 | -6.176 | -0.964 | -4.222 | 2.136  | -0.646  | -0.470   | 0.002926 | 0.018363 | -3.813   | 0.031917 | 0.205247 | 3.053    | 0.495259 | 0.714806 | 1.216    |          |        |
| sp P19827 F10 P19827    | F10_HUMAN    | F10     | inter-alpha-2(I) fibrinogen chain               | -2.036 | -6.511 | -4.237 | -4.129 | -3.224 | 0.869  | -0.808 | -1.760 | 0.858  | 1.842  | 2.585  | 5.977  | 4.554   | -0.387   | 0.002911 | 0.018363 | 4.868    | 0.007927 | 0.124212 | 2.894    | 0.038213 | 0.168061 | 3.159    |          |        |
| sp P14118 PRN3 P14118   | PRN3_HUMAN   | PRN3    | protease 3                                      | -4.830 | -2.398 | -5.741 | -8.157 | -1.746 | -2.458 | -3.197 | -3.239 | 3.107  | -1.565 | -3.640 | -1.166 | 2.494   | 5.687    | 0.002942 | 0.018363 | -4.255   | 0.031743 | 0.580668 | 1.743    | 0.069373 | 0.231919 | 4.016    |          |        |
| sp Q02109 CTO1 Q02109   | CTO1_HUMAN   | CTO1    | coactosin like F-actin binding protein          | 1.606  | -0.261 | 4.111  | 0.969  | -0.009 | 0.939  | 1.367  | 3.141  | 2.684  | 4.450  | 5.947  | 3.610  | 1.630   | 2.642    | 0.002976 | 0.018458 | 1.193    | 0.031639 | 0.038585 | -1.275   | 0.059579 | 0.377765 | -0.128   |          |        |
| sp P68871 HBB P68871    | HBB_HUMAN    | HBB     | hemoglobin, blood, beta                         | 2.135  | 2.789  | 1.229  | 3.075  | 4.824  | 1.904  | 4.447  | 3.135  | 7.236  | 10.056 | 9.889  | 7.881  | 3.282   | 6.181    | 0.003014 | 0.018531 | 3.441    | 0.024230 | 0.130310 | 3.214    | 0.701155 | 0.848311 | 3.762    |          |        |
| sp Q092H0 GPC Q092H0    | GPC5B_HUMAN  | GPC5B   | G protein-coupled receptor 5B                   | 0.759  | -0.816 | 0.634  | 0.421  | 0.520  | -1.240 | -3.557 | -2.007 | -1.334 | -1.425 | -2.670 | -0.171 | -3.378  | -7.097   | 0.003025 | 0.018531 | -3.777   | 0.022706 | 0.445791 | -2.004   | 0.040161 | 0.266121 | -0.272   |          |        |
| sp P20700 LMM P20700    | LMNB1_HUMAN  | LMNB1   | lamin B1                                        | -4.535 | -5.950 | -5.256 | -8.780 | -1.497 | -5.688 | -4.790 | -5.239 | -2.495 | -3.600 | -6.460 | -2.928 | -1.862  | -1.971   | 0.003154 | 0.019118 | 2.637    | 0.003642 | 0.051212 | 2.645    | 0.967378 | 0.983309 | -0.013   |          |        |
| sp Q1428 SPT Q1428      | SPT2_HUMAN   | SPT2    | serine peptidase 2                              | 1.428  | 0.889  | 1.001  | 0.388  | -0.121 | 0.287  | 0.461  | 1.225  | -0.239 | -1.166 | 0.115  | -2.412 | -1.430  | 1.406    | 0.003358 | 0.020315 | -1.784   | 0.015719 | 0.059492 | -1.748   | 0.076531 | 0.358699 | -0.609   |          |        |
| sp P01780 MM1 P01780    | MM9_HUMAN    | MM9     | matrix metalloproteinase 9                      | -1.484 | -2.088 | -6.461 | -1.965 | -0.937 | -0.958 | 1.232  | -1.535 | 3.535  | 4.089  | -1.599 | 1.822  | 0.325   | 5.420    | 0.003570 | 0.021237 | -2.249   | 0.027819 | 0.051829 | -1.903   | 0.062323 | 0.293553 | -1.417   |          |        |
| sp Q08380 LGI3 Q08380   | LGS3B_HUMAN  | LGS3B   | galactin 3, b1-bone marrow                      | 5.960  | 6.507  | 4.824  | 6.032  | 5.643  | 5.588  | 6.682  | 7.137  | 3.997  | 3.527  | 5.284  | 3.546  | 2.036   | 2.000    | 0.003557 | 0.021235 | -2.175   |          |          |          |          |          |          |          |        |

|          |              |           |                           |        |        |        |         |         |         |        |        |        |        |        |         |          |          |          |          |          |          |          |          |          |          |        |
|----------|--------------|-----------|---------------------------|--------|--------|--------|---------|---------|---------|--------|--------|--------|--------|--------|---------|----------|----------|----------|----------|----------|----------|----------|----------|----------|----------|--------|
| PEP30086 | PEP30086     | PEBP1     | phosphatidylethanolan     | 2.785  | 2.876  | 2.285  | 3.848   | 3.248   | 1.389   | 0.799  | 2.142  | 1.964  | 0.363  | -1.485 | -1.058  | -0.180   | 2.970    | 0.015174 | 0.058316 | -1.992   | 0.145099 | 0.356971 | -1.014   | 0.026810 | 0.135062 | -1.565 |
| PEP02748 | CO9_P02748   | CE9       | complementiver            | 1.024  | -0.905 | -4.904 | -4.816  | -0.770  | 3.666   | 1.203  | 0.168  | 1.137  | 3.405  | 2.471  | 5.971   | 6.586    | 1.110    | 0.015769 | 0.060365 | 4.112    | 0.362078 | 0.603513 | 1.766    | 0.051337 | 0.199896 | 3.753  |
| PEP07475 | CO9_P07475   | FE20B     | fe20b                     | -4.339 | -3.548 | -4.408 | -2.934  | -7.037  | 3.116   | -3.694 | -7.291 | 0.214  | 0.873  | -0.726 | -3.273  | 1.148    | -5.549   | 0.015896 | 0.060616 | 2.929    | 0.229708 | 0.460555 | 2.766    | 0.059537 | 0.177884 | 0.857  |
| PEP09564 | CO7_P09564   | CD7       | CD7 molecule liver/muscl  | 1.430  | 0.780  | 0.885  | 1.167   | 0.688   | -0.841  | -4.277 | 2.509  | -1.370 | -4.475 | -0.199 | 0.164   | -2.313   | -2.650   | 0.016249 | 0.061483 | -1.909   | 0.211868 | 0.445559 | -1.539   | 0.030751 | 0.148452 | -0.591 |
| PEP08835 | CAB_P08835   | SOF4      | stromal cell clone        | -2.833 | -5.853 | -0.949 | -0.932  | -0.686  | -3.627  | -3.329 | -1.899 | -3.251 | -6.364 | -8.895 | -6.199  | -5.083   | -5.171   | 0.016384 | 0.061755 | -2.475   | 0.068877 | 0.272011 | -1.029   | 0.027969 | 0.150726 | -0.714 |
| PEP04040 | ADH3B_04040  | HV551     | None                      | None   | None   | None   | None    | None    | None    | None   | None   | None   | None   | None   | None    | 0.016603 | 0.062341 | 3.246    | 0.498841 | 0.742024 | 0.665    | 0.000808 | 0.092227 | 4.129    |          |        |
| PEP09567 | FBLN_A09567  | EFEM2P    | EGF containing fibulin    | 2.263  | 0.575  | 0.433  | -2.291  | 0.445   | -0.129  | 1.199  | 2.041  | -0.771 | 0.409  | 0.232  | -5.462  | -4.144   | -0.673   | 0.016756 | 0.062674 | -2.781   | 0.095751 | 0.236950 | -0.870   | 0.066286 | 0.844017 | 0.412  |
| PEP01153 | RNAI_P01153  | RNA52     | ribonuclease blood        | 7.044  | 4.963  | 6.088  | 6.236   | 6.789   | 3.640   | 5.238  | 6.756  | 5.613  | 3.692  | 5.710  | 2.262   | 2.362    | 5.700    | 0.016908 | 0.062765 | -2.368   | 0.300091 | 0.541601 | -2.368   | 0.032662 | 0.468364 | -1.016 |
| PEP16284 | PEP16284     | PECAM1    | platelet and endothel     | -1.582 | -1.947 | -1.149 | -0.982  | -1.187  | -4.527  | -2.269 | -5.783 | -8.991 | -3.272 | -2.752 | -7.584  | -3.070   | -4.505   | 0.016849 | 0.062765 | -2.717   | 0.016849 | 0.534548 | -1.660   | 0.039116 | 0.151834 | -1.619 |
| PEP01008 | ANTP_P01008  | SERPINC1  | serpin family member      | 2.329  | 4.466  | 0.810  | 1.928   | 2.826   | 7.987   | 6.011  | 4.013  | 4.818  | 5.499  | 6.374  | 6.291   | 8.371    | 3.494    | 0.017121 | 0.063652 | 1.882    | 0.791353 | 0.911880 | -2.005   | 0.025676 | 0.133136 | 3.339  |
| PEP06748 | GA3_Q06748   | GASK1B    | gask1b associa small,inte | -3.238 | -2.763 | -2.110 | -1.826  | -0.935  | -1.740  | -2.818 | -1.058 | -4.614 | -3.206 | -0.682 | -4.565  | -3.249   | -4.291   | 0.016821 | 0.063813 | -1.335   | 0.097680 | 0.290079 | -1.410   | 0.057430 | 0.276727 | 0.122  |
| PEP00745 | FAL12_P00745 | FAL12     | coagulation liver/stron   | -0.857 | -1.554 | -3.474 | -1.706  | -1.633  | -3.984  | -4.818 | -0.631 | -1.886 | 0.864  | -2.033 | 2.019   | 2.799    | 0.017617 | 0.064663 | 2.536    | 0.010139 | 0.298152 | -2.964   | 0.072740 | 0.881935 | -0.433   |        |
| PEP04003 | C4B_P04003   | C4BPA     | complement liver          | -7.122 | -4.272 | -2.736 | -1.513  | -1.475  | -11.677 | -9.065 | -2.819 | -0.754 | -2.364 | -5.728 | -7.328  | -2.479   | 0.615    | 0.017175 | 0.064700 | 5.309    | 0.005556 | 0.069836 | 8.078    | 0.025966 | 0.135062 | -0.430 |
| PEP03740 | ILEU_P03740  | SERPINC1B | serpin family blood,bon   | -3.355 | -3.798 | -1.117 | -12.207 | -8.406  | -5.275  | -5.423 | -4.573 | -1.684 | -4.467 | -1.926 | -1.200  | -3.887   | 2.248    | 0.017751 | 0.064670 | 4.437    | 0.007502 | 0.028388 | 3.999    | 0.045266 | 0.126564 | -0.740 |
| PEP02M25 | CEC_Q02M25   | CE064     | None                      | None   | None   | None   | None    | None    | None    | None   | None   | None   | None   | None   | None    | 0.017923 | 0.065022 | -2.162   | 0.205382 | 0.434718 | -1.040   | 0.203858 | 0.427565 | -1.795   |          |        |
| PEP08582 | TRFA_P08582  | MELTF     | melanotranskin            | -1.160 | -2.010 | -0.336 | -0.413  | 0.552   | -7.435  | -2.258 | -6.103 | -3.926 | -3.014 | -9.438 | -7.451  | -3.960   | 0.018036 | 0.065252 | -1.989   | 0.840596 | 0.928736 | 0.077    | 0.03703  | 0.110947 | -3.306   |        |
| PEP01877 | IGHF_P01877  | IGHA2     | None                      | None   | None   | None   | None    | None    | None    | None   | None   | None   | None   | None   | None    | 0.018221 | 0.065649 | 2.736    | 0.521153 | 0.744239 | 0.667    | 0.009957 | 0.088448 | 3.310    |          |        |
| PEP33574 | GLR_P33574   | GLRX      | glutaredoxin              | 0.128  | 1.011  | -5.980 | -2.108  | -1.279  | 1.349   | 1.880  | 3.077  | 4.311  | 3.455  | -5.005 | 2.922   | 2.428    | 0.018341 | 0.065838 | 2.377    | 0.018341 | 0.065838 | 2.377    | 0.017435 | 0.110947 | 3.678    |        |
| PEP56537 | IFE_P56537   | EF6       | eukaryotic translation    | 0.464  | -2.022 | -1.200 | 1.359   | -0.041  | 0.000   | -0.414 | 1.385  | -2.782 | -0.769 | -2.877 | -5.137  | -4.619   | -3.628   | 0.018664 | 0.066754 | -2.664   | 0.009432 | 0.204176 | -2.877   | 0.747356 | 0.870788 | 0.341  |
| PEP01515 | KVD_P01515   | KVD28     | None                      | None   | None   | None   | None    | None    | None    | None   | None   | None   | None   | None   | None    | 0.018927 | 0.067450 | 4.086    | 0.009432 | 0.076513 | 5.069    | 0.056049 | 0.756613 | -1.574   |          |        |
| PEP00274 | SUS_Q00274   | SUSD2     | su5 domain containin      | -1.495 | -1.004 | -7.286 | 1.041   | 0.354   | -2.945  | 0.651  | -3.097 | -2.546 | -1.741 | -7.928 | -5.607  | -5.777   | 0.019087 | 0.067737 | -3.343   | 0.048006 | 0.406691 | -3.176   | 0.078435 | 0.217676 | -0.379   |        |
| PEP08944 | SCU_Q08944   | SCUB1     | insulin peptide,peripl    | 3.230  | -4.836 | -6.117 | -5.048  | -4.641  | -2.635  | -3.978 | -1.185 | -0.466 | -2.900 | -0.747 | -2.371  | -3.572   | -0.620   | 0.019365 | 0.068513 | 2.101    | 0.019365 | 0.068513 | 2.101    | 0.029312 | 0.144350 | -0.193 |
| PEP01344 | IGF2_P01344  | IGF2      | insulin like g,polacenta; | -0.279 | -1.137 | -1.243 | -1.102  | -1.756  | -3.157  | -2.425 | -1.124 | -0.324 | 0.164  | 0.207  | -1.275  | -1.287   | -3.325   | 0.019818 | 0.068622 | 1.820    | 0.118243 | 0.314450 | -1.728   | 0.068537 | 0.927627 | -0.166 |
| PEP05161 | FCG_Q05161   | FCG3B     | Fc fragment blood         | 0.181  | 1.149  | 0.019  | 0.997   | 2.549   | -1.434  | 1.075  | 2.942  | -0.828 | -1.325 | -0.540 | -1.095  | -0.484   | 0.020248 | 0.071110 | -1.600   | 0.173619 | 0.397423 | -1.089   | 0.015123 | 0.503986 | -1.812   |        |
| PEP09040 | MAI_Q09040   | MATN4     | matn4                     | 0.728  | -3.470 | 0.237  | 0.123   | -2.812  | -2.132  | -0.205 | 1.549  | -1.359 | -4.239 | -2.519 | -3.932  | -6.022   | -6.757   | 0.020890 | 0.071213 | -3.178   | 0.060809 | 0.219204 | -3.283   | 0.02141  | 0.955584 | 0.169  |
| PEP09074 | ENPH_Q09074  | ENPH1     | enophase                  | -2.548 | -1.216 | -2.845 | -6.204  | -3.701  | -9.629  | -2.997 | -2.766 | -0.748 | -1.484 | -1.903 | -0.800  | -4.160   | -1.898   | 0.021546 | 0.075142 | 2.164    | 0.039734 | 0.258734 | -3.319   | 0.016908 | 0.738373 | -1.848 |
| PEP09574 | LYPI_Q09574  | LYPD3     | enoyl-PLAUR domain c      | -1.057 | -3.847 | -1.251 | -2.297  | 0.078   | -2.129  | -3.804 | -2.256 | -2.215 | -5.962 | -5.327 | -2.972  | -3.144   | -4.883   | 0.021634 | 0.075142 | -2.440   | 0.021634 | 0.258734 | -3.319   | 0.033303 | 0.532947 | -1.785 |
| PEP01584 | ADIP_Q01584  | ADIPQ1    | adiponectin, serpin, tiss | -1.700 | -5.117 | -4.124 | -7.477  | -0.806  | -0.886  | 0.516  | -5.692 | -2.619 | -0.250 | -4.377 | 0.074   | -0.504   | -2.175   | 0.021919 | 0.075704 | 3.068    | 0.019389 | 0.367399 | -2.964   | 0.013738 | 0.336829 | 3.464  |
| PEP08842 | TDQ_Q08842   | TDKDC17   | thiodionin                | -4.998 | -2.387 | -2.001 | -4.552  | -1.822  | -3.249  | -3.762 | -1.459 | 0.608  | -0.658 | -1.632 | -11.259 | -0.905   | 0.838    | 0.021939 | 0.075704 | 1.674    | 0.060551 | 0.219204 | 0.656    | 0.030348 | 0.525196 | 1.629  |
| PEP00390 | GSHI_P00390  | GSR       | glutathione-disulfide re  | -5.650 | -3.263 | -1.751 | -5.523  | -2.966  | -1.819  | -1.463 | -1.151 | 0.017  | -1.116 | -0.627 | -1.729  | -1.569   | 0.970    | 0.022894 | 0.078447 | 2.000    | 0.018368 | 0.561605 | -0.801   | 0.030650 | 0.161701 | 2.239  |
| PEP01772 | HV3_P01772   | HV333     | None                      | None   | None   | None   | None    | None    | None    | None   | None   | None   | None   | None   | None    | 0.022887 | 0.078447 | 3.756    | 0.024909 | 0.970743 | 0.673    | 0.045190 | 0.185135 | -0.909   |          |        |
| PEP06744 | GPI_P06744   | GPI       | glucose-6-phosphate is    | -4.535 | -2.495 | -3.850 | -3.825  | -1.199  | -2.574  | -2.152 | -3.261 | -0.461 | -2.296 | -4.249 | -1.888  | -0.731   | 1.931    | 0.023217 | 0.078447 | 2.588    | 0.094038 | 0.202393 | -2.744   | 0.077857 | 0.882927 | 2.297  |
| PEP02520 | FAM_Q02520   | FAM3C     | FAM3 metabolism regu      | -0.074 | 1.701  | 0.377  | 1.574   | 1.753   | 1.501   | 2.695  | 3.440  | 3.872  | 5.244  | 1.710  | 2.515   | 3.099    | 0.023294 | 0.079264 | 0.312    | 0.267087 | 0.504266 | -0.260   | 0.212389 | 0.441116 | 0.916    |        |
| PEP37873 | TALD_P37873  | TALD1     | transaldolase             | -1.324 | -1.877 | -2.846 | -2.108  | -4.048  | -2.166  | -4.227 | -1.219 | 2.580  | -1.088 | -2.288 | -0.974  | -0.672   | 5.928    | 0.023387 | 0.079264 | 2.967    | 0.06565  | 0.250513 | -2.527   | 0.059000 | 0.377765 | 0.060  |
| PEP00978 | SGP_Q00978   | SBSN      | SBSN                      | -5.041 | -4.791 | 1.757  | -5.602  | -11.909 | 0.795   | -4.858 | -3.501 | -2.755 | -0.035 | -2.123 | -4.444  | -0.937   | 2.866    | 0.023459 | 0.079264 | 2.906    | 0.038157 | 0.612095 | 1.284    | 0.128733 | 0.321832 | 2.596  |
| PEP08554 | DCI_Q08554   | DCI       | diaminocillin 1           | -1.957 | 1.071  | -8.628 | -3.818  | -3.334  | -0.949  | -8.786 | -6.716 | -0.403 | -8.664 | -1.573 | -1.990  | -2.391   | 0.044    | 0.023459 | 0.079264 | 4.276    | 0.023459 | 0.612095 | 1.284    | 0.038157 | 0.612095 | -3.372 |
| PEP00738 | CKAR_P00738  | CKAR      | CKAR (g-likilarym         | -3.464 | -2.958 | -7.003 | -1.977  | -2.611  | -2.923  | -3.002 | -2.599 | -6.167 | -3.993 | -3.672 | -5.621  | -4.423   | -6.029   | 0.023459 | 0.079264 | 1.105    | 0.023459 | 0.612095 | 1.284    | 0.038157 | 0.612095 | 0.941  |
| PEP00738 | HPT_P00738   | HPT       | haptoglobin liver         | 7.223  | 1.447  | 3.931  | 2.556   | 2.512   | 6.541   | 10.983 | 6.086  | 6.132  | 7.685  | 9.029  | 11.880  | 11.405   | 7.372    | 0.024226 | 0.081030 | 3.101    | 0.044655 | 0.760344 | 1.048    | 0.162004 | 0.363651 | 3.141  |
| PEP08519 | APOA_H08519  | APOA      | None                      | None   | None   | None   | None    | None    | None    | None   | None   | None   | None   | None   | None    | 0.024260 | 0.081030 | 1.919    | -1.193   | 0.024260 | 0.124658 | -1.502   | 0.040862 | 0.631995 | 0.494    |        |
| PEP00747 | PLM_P00747   | PLG       | plasminogen/kidney        | 3.504  | 2.294  | 3.933  | 1.684   | 2.452   | 3.360   | 5.508  | 2.788  | 4.244  | 5.123  |        |         |          |          |          |          |          |          |          |          |          |          |        |

|                        |                |          |                                                        |        |        |        |        |        |        |        |        |        |        |         |        |        |          |          |          |          |          |          |          |          |          |          |          |          |
|------------------------|----------------|----------|--------------------------------------------------------|--------|--------|--------|--------|--------|--------|--------|--------|--------|--------|---------|--------|--------|----------|----------|----------|----------|----------|----------|----------|----------|----------|----------|----------|----------|
| sp Q8N307 MU08307      | MUC2O_HUMAN    | MUC2O    | mucin 2O, cecidney                                     | -0.719 | -2.658 | -1.387 | -0.678 | 1.468  | -3.105 | -4.932 | -1.800 | -2.354 | -2.319 | -5.471  | -7.403 | -6.246 | -2.010   | 0.033468 | 0.136456 | -2.575   | 0.584767 | 0.781817 | -1.023   | 0.042863 | 0.180598 | -2.484   |          |          |
| sp P55299 EPN2_P55299  | EPN2_HUMAN     | GP2      | glycophorin b                                          | 1.507  | -0.894 | -0.278 | -0.977 | 1.324  | 0.281  | -3.518 | 2.030  | -0.032 | -0.869 | 0.898   | -3.487 | -1.744 | 0.000    | 0.053678 | 0.136659 | -4.709   | 0.549924 | 0.764433 | -0.969   | 0.345309 | 0.571627 | -1.185   |          |          |
| sp P55299 EPN2_P55299  | EPN2_HUMAN     | EPN2     | glycophorin b                                          | -5.281 | -0.309 | -1.124 | -7.984 | -5.084 | -3.000 | -8.525 | -1.123 | -1.957 | -1.922 | -0.896  | -3.400 | -2.400 | -2.336   | 0.054037 | 0.136659 | 2.257    | 0.507483 | 0.401121 | -0.264   | 0.888423 | 0.943288 | 0.309    |          |          |
| sp P55150 SCG5_P55150  | SCG5_HUMAN     | SCG5     | secretory phospholipase A2                             | 0.525  | -3.141 | -0.422 | -0.606 | 0.874  | -2.179 | -3.040 | 0.010  | 0.010  | 0.010  | -0.574  | -1.215 | -0.741 | -0.010   | 0.059963 | 0.147539 | -4.848   | 0.242433 | 0.133010 | 2.213    | 0.157396 | 0.365356 | 0.680    |          |          |
| sp P17931 LEG3_P17931  | LEG3_HUMAN     | LEG3     | galactin 3                                             | -2.350 | -2.026 | -3.446 | -5.315 | -1.477 | -2.220 | -1.768 | -6.447 | 0.151  | 0.558  | -2.210  | -6.397 | -1.253 | 0.171    | 0.054293 | 0.137123 | 2.201    | 0.121956 | 0.330158 | 1.215    | 0.872855 | 0.926909 | 1.622    |          |          |
| sp P28065 PSA5_P28065  | PSA5_HUMAN     | PSMA5    | proteasome 20S subunit alpha 5                         | -2.361 | -4.230 | -6.291 | -5.772 | -7.879 | -0.076 | -2.393 | -7.646 | -1.050 | -2.800 | -1.960  | -4.100 | -0.412 | 0.055207 | 0.139032 | 2.419    | 0.576039 | 0.778338 | 2.184    | 0.399807 | 0.619202 | 1.817    | 0.000000 | 0.000000 | 0.000000 |
| sp Q02747 GUC_Q02747   | GUC2A_HUMAN    | GUC2A    | guanylate cyclase activator 2                          | 2.143  | 0.937  | 0.515  | -0.962 | -2.222 | 2.903  | 4.055  | 3.680  | 4.000  | 4.976  | 2.832   | -0.657 | 4.432  | 4.300    | 0.000    | 0.055376 | 0.139151 | 1.686    | 0.31236  | 0.808337 | -0.229   | 0.016743 | 0.063409 | 3.064    |          |
| sp P60953 GUC_P60953   | DCO2C_HUMAN    | DCO2C    | cell division cycle 42                                 | -2.454 | -2.691 | -1.596 | -1.911 | -1.696 | -3.501 | -5.622 | -1.776 | -2.447 | -1.207 | -3.663  | -1.646 | -5.111 | 0.196    | 0.055580 | 0.139305 | 1.333    | 0.201294 | 0.808366 | -0.279   | 0.001948 | 0.378066 | -1.184   |          |          |
| sp Q04370 ACT_Q04370   | ACTN4_HUMAN    | ACTN4    | actinin alpha 4                                        | -2.364 | -3.200 | -2.817 | -2.651 | -4.271 | -2.670 | -4.777 | -4.102 | -1.447 | -2.754 | -3.349  | -2.022 | -2.332 | 0.000    | 0.055959 | 0.139888 | 2.447    | 0.070078 | 0.240970 | 2.940    | 0.181942 | 0.393568 | -0.789   |          |          |
| sp Q14559 DIAC_Q14559  | DIAC_HUMAN     | CTBS     | chitinase b                                            | 0.310  | 0.919  | 0.870  | -1.106 | 1.896  | 2.763  | 3.762  | 3.140  | 2.199  | 2.883  | 2.249   | 2.279  | 2.805  | -0.528   | 0.056472 | 0.140821 | -2.166   | 0.100672 | 0.296271 | -2.740   | 0.201348 | 0.425261 | -2.740   |          |          |
| sp Q09715 COL_Q09715   | COL12A1_HUMAN  | COL12A1  | collagen type XIII, alpha 1                            | -0.266 | -0.086 | -0.326 | 1.781  | 0.239  | -2.954 | -3.508 | -1.104 | -2.978 | -0.225 | -6.043  | -3.580 | -5.904 | -0.504   | 0.056982 | 0.141231 | 2.743    | 0.445636 | 0.806150 | -0.720   | 0.000979 | 0.024758 | -2.760   |          |          |
| sp Q09715 COL_Q09715   | APOC1_HUMAN    | APOC1    | apolipoprotein I                                       | -0.615 | -3.909 | -9.301 | -5.076 | -0.414 | -2.292 | -1.307 | -2.674 | -2.713 | -0.416 | -5.740  | -3.380 | -2.247 | -0.147   | 0.057483 | 0.142618 | 2.893    | 0.358798 | 0.620995 | -1.455   | 0.009388 | 0.178170 | 2.952    |          |          |
| sp Q14495 ISR_Q14495   | ISR_HUMAN      | ISR      | immunoglobulin heavy chain constant 1                  | 0.523  | 1.973  | -0.352 | 0.572  | 1.894  | 1.679  | 1.378  | 1.780  | 2.024  | 1.865  | 1.572   | 3.333  | -0.624 | 0.000    | 0.059903 | 0.147539 | -4.848   | 0.059903 | 0.147539 | -4.848   | 0.059903 | 0.147539 | -4.848   |          |          |
| sp P02647 APO_P02647   | APOA1_HUMAN    | APOA1    | apolipoprotein A1                                      | 2.238  | 1.268  | -2.257 | 2.441  | 0.063  | 6.169  | 4.969  | 2.486  | 4.723  | 6.236  | 2.717   | 10.096 | 8.487  | 5.980    | 0.059919 | 0.147539 | 2.206    | 0.269980 | 0.504925 | 1.832    | 0.391045 | 0.612464 | 1.591    |          |          |
| sp Q09864 CLM_Q09864   | CLMP_HUMAN     | CLMP     | cadherin-like fibronectin type III domain containing 1 | -5.283 | 0.079  | -2.792 | -1.871 | -0.562 | 0.486  | 0.414  | 1.132  | -3.529 | -0.225 | -2.179  | -6.096 | -1.049 | -2.828   | 0.059862 | 0.147539 | -2.204   | 0.059862 | 0.147539 | -2.204   | 0.059862 | 0.147539 | -2.204   |          |          |
| sp P12830 CAD_P12830   | CDH1_HUMAN     | CDH1     | cadherin 1                                             | 4.335  | 5.314  | 2.036  | 3.777  | 2.911  | 4.864  | 5.965  | 5.323  | 2.443  | 3.653  | 4.446   | -2.286 | 2.580  | 1.047    | 0.061048 | 0.149942 | -2.206   | 0.061048 | 0.149942 | -2.206   | 0.061048 | 0.149942 | -2.206   |          |          |
| sp Q04279 SEM_Q04279   | SEMG1_HUMAN    | SEMG1    | semaphorin 1                                           | 9.902  | -8.217 | -5.001 | -7.606 | -5.041 | -6.334 | -3.198 | -3.411 | 2.983  | -1.848 | -4.286  | -1.348 | -5.840 | 0.061048 | 0.150147 | 2.016    | 0.061048 | 0.150147 | 2.016    | 0.061048 | 0.150147 | 2.016    |          |          |          |
| sp P05937 CAL_P05937   | CALB1_HUMAN    | CALB1    | calbindin 1, kidney                                    | -2.653 | -2.404 | -4.228 | -2.919 | -0.775 | -1.218 | -2.443 | -2.758 | -2.176 | -5.771 | -11.382 | -3.254 | -3.968 | 0.000    | 0.061438 | 0.150147 | -2.784   | 0.179097 | 0.240790 | -2.694   | 0.881421 | 0.939476 | -1.144   |          |          |
| sp P06727 APO_P06727   | APOA4_HUMAN    | APOA4    | apolipoprotein A4                                      | 1.987  | -1.566 | -0.213 | 1.126  | 3.640  | 1.201  | 1.622  | 4.600  | 3.817  | -1.406 | 6.509   | 7.830  | 1.560  | 0.062056 | 0.151281 | 2.218    | 0.062056 | 0.151281 | 2.218    | 0.062056 | 0.151281 | 2.218    |          |          |          |
| sp P61158 HBP1_P61158  | ARR3_HUMAN     | ACTR3    | actin related protein 3                                | -0.538 | -4.449 | -5.945 | -7.554 | -2.469 | -5.539 | -9.549 | -6.253 | -1.161 | -5.469 | -2.105  | -5.329 | -2.688 | 2.531    | 0.062959 | 0.153075 | 2.920    | 0.061317 | 0.100118 | 7.477    | 0.117216 | 0.380859 | -2.923   |          |          |
| sp Q09803 SCR_Q09803   | SRR3_HUMAN     | SCR3     | serpin carrier family 3, member 3                      | 1.881  | 0.971  | -0.488 | 0.627  | 0.217  | 1.966  | 2.838  | 0.077  | 1.909  | 1.526  | 4.348   | 0.863  | -3.028 | 0.000    | 0.063750 | 0.153075 | 2.845    | 0.063750 | 0.153075 | 2.845    | 0.063750 | 0.153075 | 2.845    |          |          |
| sp Q167750 H2A_Q167750 | H2AC2_HUMAN    | H2AC2    | H2A clustered histone                                  | -1.030 | -1.652 | -0.608 | -2.895 | -2.663 | -7.388 | -5.847 | -0.948 | -2.788 | -3.147 | -0.832  | -0.830 | -3.643 | 0.063650 | 0.153075 | 2.840    | 0.063650 | 0.153075 | 2.840    | 0.063650 | 0.153075 | 2.840    |          |          |          |
| sp Q145240 HLA_Q145240 | HABP2_HUMAN    | HABP2    | hyaluronan binding protein 2                           | -5.184 | -3.828 | -3.573 | -8.119 | -5.459 | -1.524 | -4.821 | -2.574 | -6.035 | -1.312 | -6.466  | -3.211 | 2.388  | -2.568   | 0.064174 | 0.154523 | 2.737    | 0.062101 | 0.808337 | 0.861    | 0.136954 | 0.368289 | -2.259   |          |          |
| sp Q60W409 MLG_Q60W409 | MUC6_HUMAN     | MUC6     | mucin 6, oligomeric core 1 type                        | 1.468  | -7.022 | -4.833 | -6.530 | -4.813 | -6.827 | -4.121 | -4.827 | -0.504 | -5.597 | -4.771  | -1.538 | -4.020 | -2.070   | 0.064119 | 0.154523 | 1.716    | 0.126932 | 0.336540 | 2.847    | 0.923967 | 0.960258 | 1.009    |          |          |
| sp Q02956 TIR_Q02956   | TNFRSF14_HUMAN | TNFRSF14 | TNFR type I receptor class 1 member 14                 | 3.020  | 2.236  | -4.911 | 2.214  | 0.744  | 1.516  | 3.330  | 0.610  | 0.685  | 0.943  | 1.663   | -3.411 | -0.074 | -1.119   | 0.066421 | 0.159540 | -1.000   | 0.156768 | 0.376561 | -1.109   | 0.881844 | 0.943288 | -1.828   |          |          |
| sp P55285 CAD_P55285   | CDH6_HUMAN     | CDH6     | cadherin 6, kidney/ovary                               | -2.058 | -1.117 | -0.963 | -2.689 | -1.483 | -5.945 | -2.860 | -0.789 | -1.643 | -1.643 | -1.643  | -1.643 | -1.643 | -1.643   | 0.066686 | 0.159786 | -1.985   | 0.090332 | 0.858162 | -0.909   | 0.225074 | 0.592285 | 0.721    |          |          |
| sp P03952 KLUK_P03952  | KLK1B_HUMAN    | KLK1B    | kallikrein B1, liver                                   | -4.870 | -4.228 | -5.702 | -2.992 | -3.959 | -7.915 | -4.289 | -1.675 | -7.748 | -4.424 | -2.751  | 2.746  | 0.010  | -0.562   | 0.066959 | 0.160408 | 2.020    | 0.066862 | 0.643104 | 2.235    | 0.950208 | 0.980654 | -0.343   |          |          |
| sp P51384 LUM_P51384   | LUM_HUMAN      | LUM      | lumican                                                | 2.524  | 2.466  | -7.149 | 0.783  | 1.468  | -0.102 | 2.911  | 2.043  | 3.009  | 3.924  | 3.233   | 3.314  | 3.551  | 1.111    | 0.070035 | 0.161696 | 1.869    | 0.058033 | 0.676678 | 0.636    | 0.153047 | 0.354227 | 2.934    |          |          |
| sp Q09803 SCR_Q09803   | SRR3_HUMAN     | SCR3     | serpin carrier family 3, member 3                      | 1.881  | 0.971  | -0.488 | 0.627  | 0.217  | 1.966  | 2.838  | 0.077  | 1.909  | 1.526  | 4.348   | 0.863  | -3.028 | 0.000    | 0.063750 | 0.153075 | 2.845    | 0.063750 | 0.153075 | 2.845    | 0.063750 | 0.153075 | 2.845    |          |          |
| sp Q03551 CHR_Q03551   | CHFR1_HUMAN    | CHFR1    | complement factor 1                                    | -0.987 | -0.106 | -1.732 | -1.739 | -1.277 | 0.170  | -0.051 | -8.409 | -1.027 | -3.640 | -1.128  | -4.459 | -4.341 | 1.945    | 0.070411 | 0.167707 | 3.483    | 0.142288 | 0.355372 | 4.051    | 0.960337 | 0.980564 | -9.190   |          |          |
| sp P07148 FABP_P07148  | FABP1_HUMAN    | FABP1    | fatty acid binding protein 1                           | 1.548  | 0.249  | -0.463 | 0.829  | -1.274 | 2.156  | 0.656  | 1.852  | 3.802  | 2.321  | 3.062   | -2.908 | 1.693  | 0.942    | 0.070764 | 0.167105 | 3.237    | 0.045725 | 0.827339 | -0.069   | 0.604239 | 0.180598 | -2.059   |          |          |
| sp P62805 H4_P62805    | H4_HUMAN       | H4       | histone H4                                             | -2.241 | -1.329 | -3.169 | -5.981 | -2.357 | -0.149 | -2.475 | 0.455  | 2.329  | -5.546 | -2.031  | 0.792  | -0.137 | 5.034    | 0.070715 | 0.167105 | 2.563    | 0.575400 | 0.778338 | 1.130    | 0.046941 | 0.190254 | -2.132   |          |          |
| sp P60645 TSPN_Q60645  | TSPAN1_HUMAN   | TSPAN1   | tetraspanin 10                                         | -0.726 | -1.399 | -3.958 | -1.173 | -1.109 | -3.677 | -1.376 | -6.080 | -1.450 | -3.574 | -0.181  | -2.662 | -2.867 | -6.038   | 0.071200 | 0.167300 | -0.221   | 0.287740 | 0.532047 | -0.127   | 0.001740 | 0.944352 | 1.299    |          |          |
| sp P12883 MYH_P12883   | MYH7_HUMAN     | MYH7     | myosin heavy chain, muscle, ventricular, adult, 7      | 8.034  | -4.540 | -2.758 | -3.029 | -3.609 | -6.160 | -3.669 | 0.369  | 2.301  | 0.788  | 2.145   | -4.928 | -2.531 | -4.810   | -3.848   | 0.072113 | 0.169474 | 2.481    | 0.194300 | 0.627380 | 1.167    | 0.739016 | 0.866310 | 0.503    |          |
| sp Q13653 PSC_Q13653   | PSCA_HUMAN     | PSCA     | prostate stem cell antigen                             | 2.378  | -1.326 | -2.848 | -0.945 | -3.357 | 0.000  | 0.752  | -1.585 | -4.490 | -2.859 | 0.009   | -2.756 | 3.028  | 0.073314 | 0.171814 | -1.988   | 0.378471 | 0.373729 | -1.935   | 0.974609 | 0.984094 | -0.084   |          |          |          |
| sp Q08474 SFRP_Q08474  | SFRP1_HUMAN    | SFRP1    | secreted frizzled related protein 1                    | -6.801 | -2.431 | -6.176 | -1.737 | -2.919 | -1.841 | -1.784 | -3.400 | -8.754 | -8.009 | -2.484  | -7.125 | -6.119 | -2.052   | 0.073361 | 0.171814 | -2.415   | 0.000704 | 0.069993 | -2.533   | 0.512883 | 0.442605 | 1.789    |          |          |
| sp P08890 HLA_P08890   | HLA_B_HUMAN    | H2B      | major histocompatibility protein 2, beta chain         | -7.757 | -0.150 | -3.996 | -0.743 | -1.563 | 0.908  | 1.269  | -2.137 | 0.755  | 1.556  | -1.865  | -7.017 | -1.758 | 0.000    | 0.073746 | 0.171814 | -1.178   | 0.008030 | 0.504266 | -2.179   | 0.068845 | 0.644017 |          |          |          |



|         |         |                         |        |        |        |        |        |        |        |        |         |        |        |        |        |          |          |          |          |          |          |          |          |          |          |          |       |
|---------|---------|-------------------------|--------|--------|--------|--------|--------|--------|--------|--------|---------|--------|--------|--------|--------|----------|----------|----------|----------|----------|----------|----------|----------|----------|----------|----------|-------|
| EN01    | EN01    | enolase 1               | 1.563  | 2.093  | 1.919  | 3.279  | 3.488  | 1.693  | 1.147  | 2.356  | 4.121   | 2.922  | -2.384 | 1.020  | 0.420  | 6.463    | 0.322101 | 0.491680 | -0.400   | 0.383485 | 0.616090 | -0.065   | 0.485638 | 0.705075 | -0.536   |          |       |
| EN23A   | ANP23A  | acidic alpha phospho    | -3.703 | -7.016 | -6.452 | -4.820 | -4.168 | 1.128  | -5.273 | -4.065 | -0.838  | -2.294 | -0.903 | -7.302 | -6.468 | 1.000    | 0.322624 | 0.491713 | 1.422    | 0.799903 | 0.990793 | -0.054   | 0.153650 | 0.355974 | 2.362    |          |       |
| ACT1    | ACT1    | actin nucleus 1         | -0.825 | -1.109 | -0.604 | -1.461 | -1.155 | -2.781 | -3.660 | -1.919 | 2.361   | -2.143 | -2.497 | 0.400  | -7.539 | 5.113    | 0.327390 | 0.497675 | 0.934    | 0.138691 | 0.425248 | 1.200    | 0.116200 | 0.091908 | -1.760   |          |       |
| ACT2    | ACT2    | actin family liver      | 8.915  | 8.009  | 8.549  | 8.009  | 8.009  | 8.009  | 8.009  | 8.009  | 8.009   | 8.009  | 8.009  | 8.009  | 8.009  | 8.009    | 0.327390 | 0.497675 | 0.934    | 0.138691 | 0.425248 | 1.200    | 0.116200 | 0.091908 | -1.760   |          |       |
| LV67    | LV67    | None                    | -9.154 | -1.646 | -9.273 | -2.297 | 1.316  | 0.227  | 0.000  | -0.967 | -1.893  | 1.411  | 1.338  | -0.142 | -1.336 | -1.861   | 0.335718 | 0.509294 | 2.263    | 0.863780 | 0.934931 | -0.167   | 0.046107 | 0.178838 | 3.984    |          |       |
| G3P     | GADPH   | glyceraldehyde bde      | 2.021  | 2.730  | 0.930  | 1.282  | 1.820  | 0.439  | 0.388  | 2.689  | 1.586   | 0.830  | 0.859  | 2.200  | 2.804  | 5.828    | 0.400771 | 0.512459 | 1.164    | 0.400771 | 0.669099 | 1.113    | 0.733555 | 0.801935 | 0.082    |          |       |
| MM7     | MM7     | matrix metalloprotein   | -2.681 | -0.094 | -0.832 | -3.003 | -2.223 | 0.215  | -1.500 | -1.800 | -0.518  | -3.412 | -2.106 | -5.710 | -3.504 | -0.833   | 0.339968 | 0.514510 | -1.006   | 0.122888 | 0.445791 | -1.718   | 0.359784 | 0.583756 | 1.138    |          |       |
| GGH     | GGH     | gamma-glutamyl hydro    | -4.111 | 3.664  | -1.648 | 1.910  | 0.212  | 0.525  | 2.319  | 1.096  | 2.938   | 1.924  | 2.268  | -1.348 | -1.487 | -0.440   | 0.404056 | 0.514396 | -0.799   | 0.689423 | 0.858162 | -0.769   | 0.203689 | 0.424879 | -0.536   |          |       |
| TYPH    | TYPH    | thymidine phosphoryl    | -0.989 | -6.245 | -0.753 | -9.086 | -1.348 | -2.011 | -0.961 | -7.747 | -1.219  | -1.430 | 0.991  | -1.845 | -1.001 | 0.341333 | 0.514264 | 1.856    | 0.332731 | 0.565366 | 2.222    | 0.607730 | 0.928823 | -0.377   | 0.050730 | 0.198862 | 3.892 |
| CAH     | CAH     | carbic anabolic         | -1.209 | 1.690  | -0.475 | -1.080 | -1.427 | -0.171 | -0.986 | -4.407 | -1.207  | 1.240  | 0.992  | 1.133  | -6.804 | -2.296   | 0.350829 | 0.516219 | -1.736   | 0.572582 | 0.577189 | -1.736   | 0.128217 | 0.859887 | -0.585   |          |       |
| None    | None    | None                    | -3.127 | 1.587  | -1.049 | -2.483 | -0.303 | -1.738 | -0.414 | -1.415 | -1.255  | 2.313  | 0.708  | 2.114  | -1.022 | 0.350440 | 0.527319 | 2.056    | 0.776612 | 0.902823 | 2.056    | 0.050730 | 0.198862 | 3.892    |          |          |       |
| CRYM    | CRYM    | crystallin mu           | -4.523 | 0.000  | -0.399 | -5.311 | -3.082 | -1.324 | -5.749 | -2.893 | -3.765  | -3.769 | -3.815 | -1.178 | -7.459 | -0.482   | 0.353239 | 0.526129 | -1.148   | 0.167730 | 0.409916 | -1.077   | 0.060919 | 0.151178 | -1.322   |          |       |
| HNRFP   | HNRFP   | heterogeneous nuclear   | -1.338 | -7.269 | 0.468  | 0.113  | -5.284 | -7.794 | -1.822 | -2.157 | 2.935   | -2.297 | -2.116 | -2.996 | -2.635 | 0.359299 | 0.526938 | -0.181   | 0.004749 | 0.059466 | 2.276    | 0.000483 | 0.023856 | -3.932   |          |          |       |
| None    | None    | None                    | -2.901 | -0.406 | -1.770 | -0.388 | -0.514 | 1.620  | 2.290  | 0.915  | -0.557  | -0.407 | 1.008  | 0.384  | 1.120  | 0.367002 | 0.539310 | 0.270    | 0.219082 | 0.452595 | -0.682   | 0.068008 | 0.065353 | 2.804    |          |          |       |
| LYVE1   | LYVE1   | lymphatic veclanta      | 3.576  | 0.108  | 0.222  | 1.169  | 0.527  | 1.621  | 3.723  | 3.709  | 3.937   | 2.684  | 3.003  | 0.139  | 2.149  | 1.471    | 0.360807 | 0.539130 | 0.876    | 0.007349 | 0.070766 | -2.051   | 0.107767 | 0.295646 | 1.749    |          |       |
| RNASE4  | RNASE4  | ribonuclease iv         | -3.050 | -4.131 | -1.493 | -6.569 | -3.758 | -9.447 | -3.157 | -0.135 | -4.978  | 0.169  | -0.541 | -0.939 | -1.440 | 0.362826 | 0.542101 | 1.543    | 0.472602 | 0.695421 | 1.543    | 0.694966 | 0.843435 | -0.446   |          |          |       |
| STIP1   | STIP1   | stress induced phosph   | -3.237 | -5.157 | -4.425 | -0.915 | -2.877 | -5.803 | -6.268 | -5.284 | -5.157  | -5.001 | -1.448 | -2.884 | -2.261 | -1.877   | 0.043412 | 0.542741 | 1.289    | 0.087394 | 0.274442 | 1.821    | 0.024435 | 0.130145 | -0.304   |          |       |
| DEFA6   | DEFA6   | defensin alpha 6        | -5.415 | -5.148 | -0.469 | -0.032 | -0.238 | -5.838 | -3.008 | -7.232 | -11.379 | -2.700 | -2.466 | -7.845 | -5.246 | -2.355   | 0.370469 | 0.550925 | -1.921   | 0.899956 | 0.955333 | -1.921   | 0.157299 | 0.363636 | -3.094   |          |       |
| TP1     | TP1     | tumor protein, translat | -2.967 | -2.697 | -2.826 | -4.780 | -3.840 | -6.099 | -2.618 | -7.100 | -2.977  | -1.203 | -6.916 | -4.182 | -3.881 | -2.027   | 0.373280 | 0.552927 | 0.892    | 0.191175 | 0.417265 | 1.741    | 0.182117 | 0.393568 | -1.359   |          |       |
| AP0H    | AP0H    | apolipoprotein liver    | 4.672  | 4.969  | 9.887  | 4.258  | 4.241  | 5.950  | 4.650  | 2.937  | 3.949   | 3.700  | 2.737  | 6.967  | 7.360  | 5.477    | 0.374432 | 0.535439 | 0.954    | 0.710807 | 0.866586 | 0.524    | 0.597200 | 0.777777 | 0.687    |          |       |
| CTSB    | CTSB    | cathepsin B             | 3.304  | 4.637  | 0.521  | 3.044  | 2.570  | 2.760  | 4.394  | 2.590  | 4.476   | 2.824  | 3.175  | 2.208  | 2.197  | 1.832    | 0.374388 | 0.535439 | 0.954    | 0.167115 | 0.607612 | -1.198   | 0.781524 | 0.882927 | 0.433    |          |       |
| YWHAE   | YWHAE   | tyrosine 3-monooxyge    | -2.542 | -0.831 | -1.935 | -4.244 | -1.130 | -1.449 | -1.282 | -1.570 | -1.123  | -3.769 | 0.259  | -0.291 | -5.092 | -6.631   | 0.374337 | 0.535439 | -0.796   | 0.374337 | 0.535439 | -0.796   | 0.527407 | 0.882727 | -0.652   |          |       |
| CP      | CP      | ceruloplasmin           | 5.346  | 7.729  | 2.971  | 4.224  | 0.403  | 8.737  | 9.083  | 5.108  | 5.317   | 7.002  | 8.470  | 9.129  | 8.957  | 3.800    | 0.375727 | 0.554537 | 1.225    | 0.767205 | 0.901511 | -0.515   | 0.008497 | 0.025126 | 1.784    |          |       |
| PRSS23  | PRSS23  | serine protease 23      | -4.133 | -5.752 | -2.512 | -8.610 | -3.685 | -2.384 | -5.971 | -1.013 | -2.277  | -6.008 | -4.691 | -5.120 | -6.836 | -3.201   | 0.376787 | 0.555266 | 1.242    | 0.953419 | 0.983095 | -0.116   | 0.303664 | 0.525292 | 2.804    |          |       |
| TGOLN2  | TGOLN2  | trans-golgi network p   | -3.437 | -1.765 | -2.932 | -4.243 | -3.401 | -4.290 | 0.886  | 3.071  | -1.972  | -4.536 | -6.099 | -4.945 | -3.430 | -1.327   | 0.380904 | 0.560489 | -1.014   | 0.394048 | 0.673380 | -1.460   | 0.920786 | 0.920807 | 0.713    |          |       |
| CSF1    | CSF1    | colony stimulating fac  | 4.206  | 2.038  | 2.469  | 2.553  | 2.056  | 2.970  | 3.186  | 3.368  | 4.544   | 3.952  | -2.885 | 2.842  | -1.523 | 0.381724 | 0.560848 | -1.671   | 0.232627 | 0.423632 | -1.226   | 0.242781 | 0.471940 | -0.880   |          |          |       |
| VWF     | VWF     | von Willebra's tiss     | -3.282 | -2.863 | -4.710 | -4.859 | -3.721 | -2.574 | -4.309 | -3.147 | -0.886  | -6.334 | -4.133 | -2.922 | -4.000 | 0.384321 | 0.563824 | 1.390    | 0.843632 | 0.927258 | 0.855    | 0.348137 | 0.573400 | 0.859    |          |          |       |
| ACTG1   | ACTG1   | actin gamma 1           | 3.871  | 4.757  | 3.656  | 4.935  | 5.018  | 4.214  | 3.454  | 5.303  | 6.092   | 4.686  | 3.330  | 4.835  | 3.861  | 7.462    | 0.385135 | 0.564174 | 0.742    | 0.299671 | 0.541601 | 0.985    | 0.555054 | 0.766632 | -0.391   |          |       |
| None    | None    | None                    | 0.465  | 0.614  | 2.159  | 3.289  | 3.173  | 2.598  | 2.564  | 3.013  | 2.143   | 3.983  | 4.235  | 4.000  | 2.940  | 0.397370 | 0.566601 | 0.215    | 0.476080 | 0.698441 | 0.315    | 0.744201 | 0.868554 | 0.141    |          |          |       |
| ENDO1   | ENDO1   | endonuclease domain     | 3.892  | 4.513  | -0.090 | 1.680  | 1.140  | 0.200  | 4.323  | 4.824  | 4.347   | 3.975  | 3.946  | -5.894 | 0.973  | 1.981    | 0.390042 | 0.569658 | -1.802   | 0.004600 | 0.075153 | -1.153   | 0.020910 | 0.113217 | -1.162   |          |       |
| S100A8  | S100A8  | S100 calcium bound      | 0.458  | 0.206  | 0.327  | -1.095 | 0.771  | 1.185  | -4.226 | -3.201 | 4.241   | -2.478 | -4.846 | -1.199 | 4.116  | 0.392742 | 0.572748 | 0.988    | 0.345619 | 0.591717 | 2.685    | 0.034212 | 0.156670 | -2.714   |          |          |       |
| SDC1    | SDC1    | syndecan 1              | -1.570 | -1.011 | -0.670 | 0.526  | -1.127 | -1.679 | 0.854  | 0.000  | 1.740   | 1.630  | 1.436  | -6.142 | -0.432 | -1.625   | 0.393745 | 0.573388 | 0.056    | 0.282929 | 0.923568 | 0.253    | 0.279100 | 0.503716 | 0.495    |          |       |
| ITM2B   | ITM2B   | integral membrane p     | -6.253 | -5.963 | -6.128 | -4.847 | -2.655 | -9.167 | -6.155 | -4.866 | -7.400  | -4.040 | -2.986 | 1.259  | -5.935 | -2.337   | 0.396675 | 0.576768 | 1.506    | 0.299260 | 0.541601 | -2.435   | 0.432596 | 0.653689 | -1.040   |          |       |
| ASA1    | ASA1    | N-acetylcholine amid    | -2.368 | 3.709  | -4.755 | 2.241  | 1.767  | 2.737  | 3.121  | 0.728  | 3.164   | 1.969  | 2.679  | -1.179 | 0.594  | 0.342    | 0.397383 | 0.576621 | -0.346   | 0.432314 | 0.666382 | -1.052   | 0.728433 | 0.860077 | -1.130   |          |       |
| PDGFB   | PDGFB   | platelet derived tonge  | 0.078  | 0.336  | -0.699 | -1.872 | -2.029 | -2.156 | -2.047 | -1.488 | -1.368  | -1.321 | -1.249 | -4.860 | -1.445 | 0.399243 | 0.575941 | 0.814    | 0.819658 | 0.919495 | -0.319   | 0.191603 | 0.407778 | -0.792   |          |          |       |
| SELENP1 | SELENP1 | selenin binding prot    | -2.347 | -2.001 | -1.983 | -1.617 | -2.244 | -5.468 | -5.020 | -3.505 | -0.853  | -1.376 | -2.184 | -1.793 | -4.291 | -3.009   | 0.398503 | 0.577521 | 0.667    | 0.041954 | 0.097033 | 0.470    | 0.006004 | 0.019825 | -2.916   |          |       |
| CFI20   | CFI20   | chromosome 6 open r     | -2.193 | -0.914 | -6.283 | -6.899 | -4.933 | -0.831 | -0.430 | -2.190 | -2.956  | -1.556 | -0.942 | -0.996 | -3.067 | 0.399550 | 0.577521 | 1.205    | 0.167519 | 0.593007 | 1.210    | 0.255957 | 0.585727 | 3.076    |          |          |       |
| ZG16    | ZG16    | zymogen gran proteas    | -0.631 | 1.259  | -2.709 | 1.114  | -2.665 | -4.844 | 2.036  | 0.497  | -1.704  | -1.869 | 2.066  | 3.700  | -1.825 | 0.340747 | 0.578249 | 0.332    | 0.494047 | 0.656848 | 0.332    | 0.232667 | 0.456587 | 0.707    |          |          |       |
| CT4     | CT4     | cystatin 5              | 0.439  | -2.870 | -4.281 | -1.142 | -2.145 | -4.594 | 0.561  | -0.828 | -1.435  | -3.636 | -3.160 | -3.973 | -6.482 | -0.060   | 0.405563 | 0.583161 | -0.070   | 0.366694 | 0.607612 | -1.526   | 0.356242 | 0.583756 | 0.780    |          |       |
| CX      | CX      | complement soft, ti     | 2.203  | 1.522  | -1.287 | 1.903  | 0.273  | 2.160  | 2.260  | 2.665  | 0.378   | 2.527  | 2.038  | 4.166  | 4.388  | 2.101    | 0.405658 | 0.583161 | 0.670    | 0.232331 | 0.809125 | 0.526    | 0.650760 | 0.820984 | -0.210   |          |       |
| SRL     | SRL     | sarcosine               | -0.259 | -1.317 | -0.156 | -8.988 | -1.945 | -8.409 | -4.298 | -1.489 | -2.586  | -4.556 | -1.275 | -3.766 | -3.091 | -3.427   | 0.405833 | 0.583161 |          |          |          |          |          |          |          |          |       |





|                            |               |          |                                             |        |        |        |        |        |         |        |        |        |        |        |        |         |         |          |          |        |          |          |        |          |          |        |
|----------------------------|---------------|----------|---------------------------------------------|--------|--------|--------|--------|--------|---------|--------|--------|--------|--------|--------|--------|---------|---------|----------|----------|--------|----------|----------|--------|----------|----------|--------|
| sp P61224 RAP1P61224       | RAP1B_HUMAN   | RAP1B    | RAP1B, member of RAS                        | -3.379 | -4.160 | -3.072 | -2.384 | -3.682 | -4.563  | -8.681 | -1.932 | -1.706 | -3.030 | -4.730 | -8.609 | -3.943  | -1.316  | 0.793911 | 0.864841 | 0.092  | 0.516638 | 0.741525 | 1.170  | 0.172735 | 0.382122 | -1.723 |
| sp P01619 KV3 P01619       | KV320_HUMAN   | None     | None                                        | -1.208 | 5.183  | 1.289  | 1.139  | 1.956  | 6.366   | 6.480  | 6.524  | 4.475  | 6.741  | 6.493  | 5.427  | 0.828   | 3.372   | 0.798476 | 0.866653 | 0.411  | 0.052364 | 0.204176 | -1.901 | 0.066680 | 0.066533 | 3.699  |
| sp Q6P138 ATAI Q6P138      | ATAD2_HUMAN   | ATAD2    | ATPase family AAA domain containing         | -1.403 | -0.417 | -1.796 | -3.752 | -7.152 | -0.421  | 0.539  | 0.582  | -0.927 | 0.944  | 1.430  | -1.012 | -4.866  | -2.551  | 0.798460 | 0.866563 | 0.564  | 0.160737 | 0.381793 | -1.397 | 0.017348 | 0.110947 | 3.137  |
| sp Q92800 EMJ Q92800       | EMILIN2_HUMAN | EMILIN2  | elastin microfibrillar associated protein 2 | -1.432 | -0.898 | -2.047 | -3.445 | -5.750 | -8.055  | -3.940 | -6.875 | -2.894 | -5.006 | -5.650 | -4.094 | -3.927  | -4.006  | 0.797398 | 0.866563 | 0.399  | 0.058092 | 0.218984 | -1.029 | 0.036028 | 0.161701 | -3.565 |
| sp Q00584 RTI Q00584       | RNT2_HUMAN    | RNASET2  | ribonucleasase spleen                       | 0.496  | 3.311  | -3.225 | -0.879 | -0.283 | 1.514   | 2.661  | 1.885  | 3.074  | 3.446  | 3.212  | -4.053 | -1.054  | -0.549  | 0.800916 | 0.866250 | 0.202  | 0.639028 | 0.823477 | -1.029 | 0.024417 | 0.130145 | 2.069  |
| sp AA047586 I AA047586 I   | LV460_HUMAN   | None     | None                                        | -3.248 | -4.008 | -3.528 | -3.234 | -0.699 | -0.275  | -5.273 | -3.078 | -3.852 | -1.078 | -1.455 | -4.481 | -1.813  | -0.531  | 0.805066 | 0.871785 | -0.707 | 0.828836 | 0.923558 | -1.076 | 0.780801 | 0.892702 | -1.114 |
| sp Q00264 PGR Q00264       | PGRMC1_HUMAN  | PGRMC1   | progesteron/periphera                       | -2.715 | -1.593 | -0.815 | -4.777 | -3.642 | 0.432   | -0.486 | -2.001 | -2.512 | -4.526 | 0.285  | -0.952 | 1.878   | -2.489  | 0.805990 | 0.871821 | 0.151  | 0.244296 | 0.476912 | -2.051 | 0.023626 | 0.128630 | 3.524  |
| sp P04083 ANX P04083       | ANXA1_HUMAN   | ANXA1    | annexin A1                                  | 2.112  | 2.462  | 3.542  | -6.119 | -4.685 | 4.204   | -2.243 | -3.064 | 1.832  | -2.876 | -5.762 | -1.012 | -1.460  | 2.294   | 0.811683 | 0.876045 | -0.501 | 0.181703 | 0.919495 | -0.569 | 0.973990 | 0.984094 | 0.100  |
| sp P98172 EFNF P98172      | EFNB1_HUMAN   | EFNB1    | ephrin B1                                   | 1.392  | 0.908  | -1.340 | -0.870 | -2.253 | 2.408   | 2.154  | 2.523  | 0.727  | 2.144  | 1.951  | -2.205 | 0.788   | 1.595   | 0.811218 | 0.876045 | 0.468  | 0.114271 | 0.317924 | -1.528 | 0.031302 | 0.027236 | 3.195  |
| sp P31025 LCN1 P31025      | LCN1_HUMAN    | LCN1     | lipocalin 1 eye                             | -0.197 | 0.796  | -8.663 | -2.789 | -1.489 | 0.403   | 2.090  | 2.206  | 1.301  | -1.091 | -2.567 | -3.616 | -1.429  | 1.268   | 0.815728 | 0.879434 | 0.837  | 0.236850 | 0.468915 | -1.733 | 0.026101 | 0.134625 | 4.111  |
| sp P22792 CPN P22792       | CPN2_HUMAN    | CPN2     | carboxypeptidase N sub                      | 1.124  | 1.711  | -2.470 | 2.850  | 1.034  | 1.010   | 1.619  | 0.430  | 0.304  | 1.597  | 1.930  | 3.246  | 1.382   | -3.907  | 0.819268 | 0.880098 | -0.155 | 0.708656 | 0.866586 | -0.261 | 0.692243 | 0.844017 | 0.170  |
| sp Q00796 DHS Q00796       | DHSO_HUMAN    | SORD     | sorbitol dehydrogenase                      | -3.799 | -2.209 | -5.960 | -2.443 | -1.764 | -1.162  | -2.902 | -4.987 | 0.757  | -6.459 | -5.760 | -2.079 | -3.897  | -6.488  | 0.820757 | 0.880098 | -0.120 | 0.648542 | 0.829777 | -1.029 | 0.162900 | 0.369941 | -1.839 |
| sp Q10588 BST Q10588       | BST1_HUMAN    | BST1     | bone marrow stromal                         | -1.679 | -2.244 | 0.668  | -4.747 | -4.884 | -3.599  | -1.060 | -2.473 | -1.782 | -3.361 | -1.998 | -3.632 | -2.668  | -1.025  | 0.818851 | 0.880098 | 0.091  | 0.973295 | 0.988216 | -0.033 | 0.769088 | 0.979470 | 0.200  |
| sp Q88828 TXN Q88828       | TXND5C_HUMAN  | TXND5C   | tyrosinase domain con                       | -0.134 | -0.972 | -1.678 | -3.667 | -0.859 | -11.252 | -1.166 | -1.182 | -1.934 | 1.059  | 1.011  | -6.118 | -0.802  | -2.560  | 0.820367 | 0.880098 | 0.762  | 0.694539 | 0.858162 | -1.139 | 0.882605 | 0.935476 | -2.883 |
| sp P00167 CVS P00167       | CVS5_HUMAN    | CVS5A    | cytochrome liver                            | -1.276 | -2.875 | -3.172 | -1.276 | -3.216 | -0.786  | -3.402 | -2.562 | -0.922 | -1.222 | -2.775 | -4.778 | -5.071  | -4.641  | 0.823911 | 0.882447 | -0.183 | 0.424852 | 0.658790 | -1.290 | 0.582605 | 0.581344 | -2.820 |
| sp P07900 HS9 P07900       | HS90A_HUMAN   | HSP90AA1 | heat shock protein 90                       | -1.562 | -1.101 | -6.483 | -1.363 | -2.644 | -2.177  | -0.486 | 0.150  | -3.677 | -3.484 | 0.429  | -2.322 | -3.258  | 1.580   | 0.823918 | 0.882447 | 0.444  | 0.687741 | 0.857604 | -0.677 | 0.204811 | 0.472963 | 1.793  |
| sp P17066 HSP P17066       | HSP76_HUMAN   | HSPA6    | heat shock protein fam                      | -1.774 | -1.771 | -5.786 | -1.178 | -0.601 | -5.657  | -3.623 | -1.191 | -2.265 | -3.714 | -3.366 | -2.366 | -3.102  | 1.289   | 0.827461 | 0.884310 | 0.361  | 0.027120 | 0.257150 | -1.673 | 0.003094 | 0.016374 | -1.938 |
| sp P81172 HEP P81172       | HEPC_HUMAN    | HAMP     | hepcidin antimicrobial                      | 5.678  | 3.183  | 2.350  | -0.496 | -2.067 | 2.772   | 2.603  | 5.885  | 1.013  | 4.443  | 5.826  | -3.051 | 4.601   | 2.339   | 0.827199 | 0.884310 | 0.040  | 0.636900 | 0.822348 | -1.224 | 0.261340 | 0.486907 | 2.023  |
| sp P11142 HSP P11142       | HSP7C_HUMAN   | HSPA8    | heat shock protein fam                      | -1.156 | -0.520 | -0.722 | 0.669  | -0.148 | -2.807  | -3.256 | -0.499 | 1.023  | -2.059 | -2.633 | -1.364 | -10.524 | 3.577   | 0.831915 | 0.888101 | -0.942 | 0.514215 | 0.739987 | -1.889 | 0.016326 | 0.106664 | -1.810 |
| sp P09211 GSTP P09211      | GSTP1_HUMAN   | GSTP1    | glutathione S-transfer                      | 0.581  | 0.525  | -1.138 | 1.243  | 0.226  | 0.342   | -1.185 | -0.869 | 2.893  | -1.102 | -3.276 | -0.472 | -0.743  | 3.596   | 0.838362 | 0.893646 | 0.351  | 0.470412 | 0.694280 | 0.887  | 0.089868 | 0.271729 | -8.858 |
| sp Q99840 RSC Q99840       | RISC_HUMAN    | SCPEP1   | serine carboxylase, tiss                    | -1.708 | 0.285  | -6.559 | -0.845 | -0.721 | -4.027  | -2.359 | -4.329 | -0.217 | -2.342 | -3.208 | 0.027  | -4.426  | -10.294 | 0.838933 | 0.893646 | 0.877  | 0.418551 | 0.652269 | 0.162  | 0.012271 | 0.094689 | -1.662 |
| sp P31713 TGF P31713       | TGFR2_HUMAN   | TGFR2    | transforming growth fac                     | -1.557 | -1.900 | -3.713 | -7.198 | -2.848 | -1.275  | -1.665 | 2.788  | -2.550 | -1.317 | -1.348 | -2.919 | -2.221  | -2.926  | 0.842124 | 0.895103 | 1.074  | 0.151127 | 0.694280 | -0.985 | 0.682329 | 0.234647 | 3.295  |
| sp P02760 AMB P02760       | AMB_HUMAN     | AMB      | alpha-1-micro liver                         | 11.979 | 11.244 | 8.610  | 9.505  | 6.909  | 11.024  | 10.768 | 11.365 | 11.312 | 11.122 | 11.118 | 8.416  | 11.192  | 10.165  | 0.843354 | 0.896406 | 0.025  | 0.722880 | 0.871381 | -0.514 | 0.085163 | 0.244591 | 0.863  |
| sp AA047586 S2 AA047586 S2 | KV209_HUMAN   | None     | None                                        | -0.141 | 1.359  | -3.315 | -0.533 | 0.303  | 2.036   | 2.128  | 1.558  | 0.658  | 0.011  | 2.211  | 3.631  | -0.948  | 0.565   | 0.845257 | 0.896406 | 0.277  | 0.059975 | 0.219204 | -1.811 | 0.036361 | 0.046501 | 3.733  |
| sp P25311 ZAK P25311       | ZAK2_HUMAN    | AZP1     | alpha-2-glycosyl:prost                      | 9.940  | 10.703 | 4.445  | 6.605  | 5.106  | 10.965  | 10.438 | 10.328 | 9.128  | 8.389  | 11.007 | 6.643  | 9.690   | 7.981   | 0.844965 | 0.896406 | 0.321  | 0.250909 | 0.130590 | -1.696 | 0.013603 | 0.098894 | 3.226  |
| sp Q99878 H2A Q99878       | H2A1_HUMAN    | H2AC14   | H2A clustered histone                       | -3.182 | -4.958 | -6.498 | -6.435 | -4.062 | -5.443  | 0.795  | -8.340 | -5.188 | -5.835 | -6.612 | -3.575 | -5.694  | -6.981  | 0.848597 | 0.899055 | -0.623 | 0.075716 | 0.778338 | -0.499 | 0.452598 | 0.588687 | -2.007 |
| sp P06865 HEX P06865       | HEXA_HUMAN    | HEXA     | hexosaminidase subun                        | -1.289 | 0.459  | -3.324 | -0.373 | -0.549 | -0.744  | 0.054  | -0.511 | 1.037  | 1.350  | 0.044  | -5.892 | -1.681  | -1.466  | 0.825254 | 0.901525 | -0.317 | 0.905709 | 0.957492 | -0.701 | 0.583346 | 0.768386 | 0.615  |
| sp Q99WV4 CZ Q99WV4        | CZB_HUMAN     | CZB      | CXC motif containing                        | -4.844 | 0.039  | -5.279 | -5.940 | -5.743 | -0.187  | 0.537  | -0.434 | 0.336  | -1.081 | -0.228 | -9.008 | -1.209  | -4.654  | 0.852769 | 0.901525 | 0.091  | 0.137713 | 0.349659 | -0.263 | 0.000023 | 0.006441 | 4.326  |
| sp P21705 STP P21705       | STOM_HUMAN    | STOM     | stomatin                                    | -2.408 | -4.843 | -5.793 | -3.012 | -3.056 | -5.344  | -4.316 | -5.876 | -1.859 | -5.237 | -6.940 | -2.447 | -7.459  | -0.959  | 0.855633 | 0.903578 | 0.181  | 0.335216 | 0.752969 | 1.029  | 0.119851 | 0.212378 | -1.356 |
| sp P04349 HLA P04349       | HLA_HUMAN     | HLA-A    | major histocompatibil                       | -2.905 | 0.721  | -2.266 | -3.465 | -6.109 | 1.219   | -1.817 | 0.875  | -5.167 | 0.260  | 0.272  | -5.990 | 0.491   | -1.398  | 0.865621 | 0.912160 | -0.295 | 0.234398 | 0.465943 | -2.558 | 0.003232 | 0.044617 | 3.620  |
| sp P06454 PTM P06454       | PTMA_HUMAN    | PTMA     | prothymosin                                 | 1.382  | -2.680 | -4.809 | -2.807 | -2.390 | -3.033  | -3.957 | 1.303  | -6.212 | -0.636 | 0.128  | -3.741 | 0.300   | -2.892  | 0.719879 | 0.912160 | 0.206  | 0.198479 | 0.869890 | -1.590 | 0.036226 | 0.277200 | 1.275  |
| sp P10599 THO P10599       | THO_HUMAN     | TXN      | thioredoxin                                 | 0.829  | 0.671  | 1.798  | 1.433  | 1.901  | 1.454   | -1.165 | 0.256  | 0.015  | -0.246 | -0.038 | -1.128 | 1.208   | 3.343   | 0.873683 | 0.919162 | 0.398  | 0.404363 | 0.669099 | -1.012 | 0.180174 | 0.393378 | -0.982 |
| sp Q99W42 ANTX Q99W42      | ANTX1_HUMAN   | ANTX1    | ANTXR cell adhesion m                       | -0.181 | 0.988  | -7.737 | -4.249 | -5.660 | 1.370   | 2.333  | 0.752  | -2.008 | 0.785  | 1.652  | -8.898 | -2.725  | -1.768  | 0.874142 | 0.919162 | -0.453 | 0.007722 | 0.076513 | -1.611 | 0.006685 | 0.027486 | -5.053 |
| sp P09659 PGR P09659       | PGLYRP2_HUMAN | PGLYRP2  | peptidoglycan recognit                      | -2.211 | 2.763  | -4.114 | -1.294 | 0.926  | 4.660   | 3.779  | 2.544  | 1.996  | 2.564  | 2.881  | 1.056  | 4.320   | 0.098   | 0.875651 | 0.919162 | 0.718  | 0.165110 | 0.381793 | -1.508 | 0.047702 | 0.191591 | 3.563  |
| sp P19957 ELAF P19957      | ELAF_HUMAN    | PI3      | peptidase in larynx;st                      | -0.302 | 1.080  | 3.920  | -3.142 | -4.843 | 3.564   | -1.136 | -0.600 | -1.666 | 1.306  | 2.664  | -7.250 | -0.029  | 2.077   | 0.808353 | 0.921737 | -0.479 | 0.151215 | 0.764952 | -1.757 | 0.507892 | 0.276620 | 1.995  |
| sp P09599 ANX P09599       | ANXA11_HUMAN  | ANXA11   | annexin A11                                 | -3.862 | -3.080 | 0.435  | -0.854 | -2.228 | -5.083  | -6.180 | -3.336 | -1.338 | -5.411 | 1.561  | -3.716 | -6.468  | -2.455  | 0.879814 | 0.921737 | -0.073 | 0.438709 | 0.669680 | 1.562  | 0.087263 | 0.266409 | -2.615 |
| sp Q11414 TRB Q11414       | TRIM29_HUMAN  | TRIM29   | tripartite motif bladder                    | -2.375 | -5.161 | -4.822 | -0.703 | -3.606 | -4.776  | -4.400 | -3.004 | -7.646 | -6.993 | -2.039 | -0.395 | -5.658  | -0.804  | 0.878677 | 0.921737 | -0.266 | 0.588836 | 0.955533 | 0.189  | 0.588836 | 0.774740 | -0.728 |

**Sample ID: 077\_D0**

| Peptide                   | Protein              | Charge | PrecursorMZ | DelM    | DelM_PPM | MH         | Scan  | DeNovoScore | MSGFScore | MSGFDB_SpecEValue | PepQValue |
|---------------------------|----------------------|--------|-------------|---------|----------|------------|-------|-------------|-----------|-------------------|-----------|
| K.DGIIWVATEGALNTPK.D      | sp PODTC9 NCAP_SARS2 | 2      | 842.95288   | 0.00793 | 4.70644  | 1684.89038 | 59204 | 109         | 90        | 8.74E-16          | 0         |
| R.NPANNAAIIVLQLPQGTTLPK.G | sp PODTC9 NCAP_SARS2 | 3      | 687.39325   | 0.01536 | 7.4586   | 2060.14976 | 53326 | 78          | 53        | 1.79E-12          | 0         |

**Sample ID: 093\_D7**

| Peptide                    | Protein              | Charge | PrecursorMZ | DelM    | DelM_PPM | MH         | Scan  | DeNovoScore | MSGFScore | MSGFDB_SpecEValue | PepQValue |
|----------------------------|----------------------|--------|-------------|---------|----------|------------|-------|-------------|-----------|-------------------|-----------|
| K.GFYAEGSR.G               | sp PODTC9 NCAP_SARS2 | 2      | 443.70663   | 0.00067 | 0.75657  | 886.405316 | 19245 | 85          | 81        | 5.31E-11          | 0.001006  |
| K.QQTVTLLPAADLDDFSK.Q      | sp PODTC9 NCAP_SARS2 | 3      | 621.32495   | 0.00603 | 3.24173  | 1861.95409 | 58671 | 87          | 58        | 1.06E-11          | 0         |
| Y.YLGTGPEAGLPYGANK.D       | sp PODTC9 NCAP_SARS2 | 2      | 803.9093    | 0.00823 | 5.12032  | 1607.80632 | 37358 | 86          | 61        | 1.79E-13          | 0         |
| R.RPQGLPNNTASWFTALTQHGK.E  | sp PODTC9 NCAP_SARS2 | 4      | 581.80493   | 0.00853 | 3.67174  | 2324.18932 | 56923 | 114         | 62        | 2.43E-14          | 0         |
| R.NPANNAAIIVLQLPQGTTLPK.G  | sp PODTC9 NCAP_SARS2 | 2      | 1030.58716  | 0.01707 | 8.29138  | 2060.14976 | 53580 | 165         | 129       | 3.10E-16          | 0         |
| K.DGIIWVATEGALNTPKDHIGTR.N | sp PODTC9 NCAP_SARS2 | 4      | 591.81689   | 0.01511 | 6.39421  | 2364.23052 | 54928 | 103         | 82        | 9.82E-17          | 0         |
| K.DGIIWVATEGALNTPK.D       | sp PODTC9 NCAP_SARS2 | 2      | 842.95294   | 0.00805 | 4.77884  | 1684.89038 | 59532 | 140         | 127       | 1.41E-17          | 0         |
| K.KQQTVTLLPAADLDDFSK.Q     | sp PODTC9 NCAP_SARS2 | 3      | 664.02356   | 0.00695 | 3.49286  | 1990.04905 | 54662 | 109         | 101       | 1.60E-18          | 0         |
| K.QQTVTLLPAADLDDFSK.Q      | sp PODTC9 NCAP_SARS2 | 2      | 931.98657   | 0.00823 | 4.42406  | 1861.95409 | 58631 | 131         | 122       | 1.70E-19          | 0         |
| R.GQGVPIINTNSSPDDQIGYYR.R  | sp PODTC9 NCAP_SARS2 | 3      | 727.68188   | 0.01042 | 4.78096  | 2181.0206  | 37129 | 128         | 119       | 1.09E-21          | 0         |
| R.RPQGLPNNTASWFTALTQHGK.E  | sp PODTC9 NCAP_SARS2 | 3      | 775.40594   | 0.0139  | 5.98229  | 2324.18932 | 56965 | 127         | 117       | 5.32E-22          | 0         |
| R.GQGVPIINTNSSPDDQIGYYR.R  | sp PODTC9 NCAP_SARS2 | 2      | 1091.01917  | 0.01024 | 4.69925  | 2181.0206  | 37104 | 255         | 251       | 9.00E-25          | 0         |
